# Supplementary material for: Prediction of incident myocardial infarction using machine learning applied to harmonized electronic health record data
Source: Springer Nature journal article supplement (doi:10.1186/s12911-020-01268-x), 2020-10-02
Supplement: MOESM1 [file 18442366]

**Supplemental Figure 1.** Calibration curve for optimal model with results from re-scaling methods

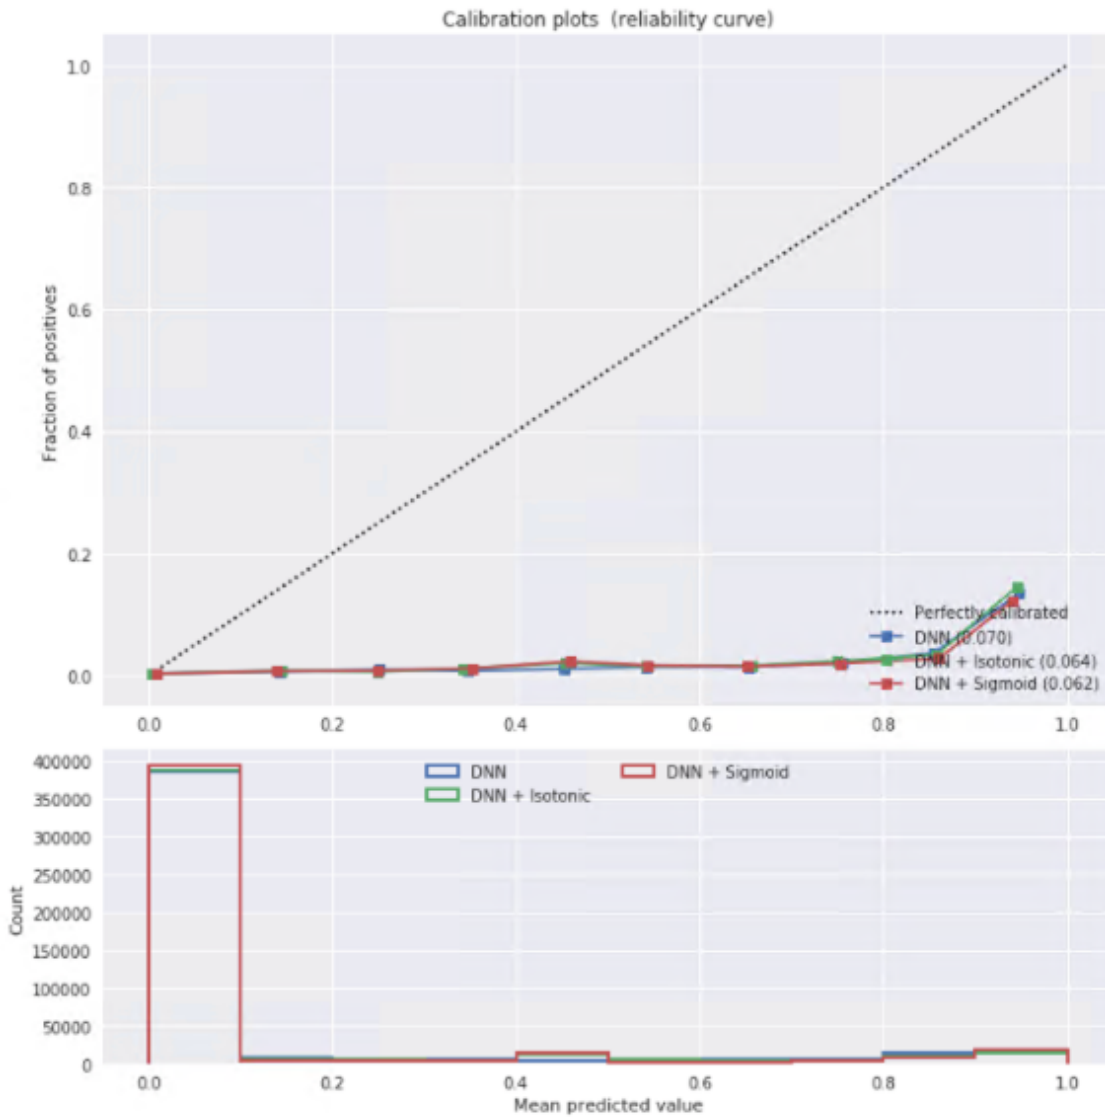

**Legend:** Calibration plot for the DNN with alternative curves demonstrating lack of improvement in calibration with use of rescaling methods (both Platt's rescaling and isotonic regression).

## Python Code:

```
{
  "cells": [
    {
      "cell_type": "code",
      "execution_count": null,
      "metadata": {},
      "outputs": [],
      "source": [
        "!pip install keras==2.2.4\n",
        "!pip install imblearn"
      ]
    },
    {
      "cell_type": "code",
      "execution_count": null,
      "metadata": {},
      "outputs": [],
      "source": []
    },
    {
      "cell_type": "code",
      "execution_count": 2,
      "metadata": {},
      "outputs": [
        {
          "name": "stderr",
          "output_type": "stream",
          "text": [
            "/usr/local/envs/py3env/lib/python3.5/site-packages/h5py/__init__.py:36: FutureWarning:
Conversion of the second argument of issubdtype from `float` to `np.floating` is deprecated. In
future, it will be treated as `np.float64 == np.dtype(float).type`.\n",
            " from ._conv import register_converters as _register_converters\n",
            "Using TensorFlow backend.\n"
          ]
        }
      ]
    }
  ],
  "source": [
    "#from MulticoreTSNE import MulticoreTSNE as TSNE\n",
    "import pandas as pd\n",
    "import glob\n",
    "import numpy as np\n",
    "import google.datalab.bigquery as bq\n",
```

```

"import pandas as pd\n",
"import tensorflow as tf\n",
"from tensorflow.contrib import lookup\n",
"from tensorflow.python.platform import gfile\n",
"import numpy\n",
"import keras as kr\n",
"from keras.preprocessing.text import Tokenizer\n",
"from keras.models import Sequential\n",
"from keras.layers import Dense, Activation, Dropout\n",
"from keras.layers.advanced_activations import LeakyReLU, PReLU\n",
"import itertools\n",
"from sklearn.metrics import confusion_matrix\n",
"import matplotlib.pyplot as plt\n",
"import datetime\n",
"import time"
]
},
{
"cell_type": "code",
"execution_count": 3,
"metadata": {},
"outputs": [],
"source": [
"def plot_confusion_matrix(cm, classes,\n",
"                        normalize=False,\n",
"                        title='Confusion matrix',\n",
"                        cmap=plt.cm.Blues):\n",
"    \"\n",
"    This function prints and plots the confusion matrix.\n",
"    Normalization can be applied by setting `normalize=True`.\n",
"    \"\n",
"    plt.imshow(cm, interpolation='nearest', cmap=cmap)\n",
"    plt.title(title)\n",
"    plt.colorbar()\n",
"    tick_marks = np.arange(len(classes))\n",
"    plt.xticks(tick_marks, classes, rotation=0)\n",
"    plt.yticks(tick_marks, classes)\n",
"\n",
"    if normalize:\n",
"        cm = cm.astype('float') / cm.sum(axis=1)[:, np.newaxis]\n",
"        #print("Normalized confusion matrix")\n",
"    else:\n",
"        #print('Confusion matrix, without normalization')\n",
"\n",

```

```

" #print(cm)\n",
"\n",
" thresh = cm.max() / 2.\n",
" for i, j in itertools.product(range(cm.shape[0]), range(cm.shape[1])):\n",
"     plt.text(j, i, cm[i, j],\n",
"             horizontalalignment=\"center\",\n",
"             color=\"white\" if cm[i, j] > thresh else \"black\")\n",
"\n",
" plt.tight_layout()\n",
" plt.ylabel('True label')\n",
" plt.xlabel('Predicted label')"
]
},
{
"cell_type": "code",
"execution_count": 4,
"metadata": {},
"outputs": [],
"source": [
"%%bq query -n requests\n",
"SELECT \n",
"label, age, sex, diag_med\n",
" FROM `hdcmlmed.adhocs.v_mi`"
]
},
{
"cell_type": "code",
"execution_count": 5,
"metadata": {},
"outputs": [
{
"name": "stderr",
"output_type": "stream",
"text": [
"/usr/local/envs/py3env/lib/python3.5/site-packages/ipykernel/__main__.py:40:
FutureWarning: reshape is deprecated and will raise in a subsequent release. Please use
.values.reshape(...) instead\n"
]
}
]
},
{
"name": "stdout",
"output_type": "stream",
"text": [
"Before OverSampling, counts of label '1': [16474]\n",

```

```
"Before OverSampling, counts of label '0': [1803364] \n",
"\n",
"f-score metric in the testing dataset: 0.07791068939155461%\n",
"AUC of test dataset is: 0.8305785067263767\n"
]
},
{
"name": "stderr",
"output_type": "stream",
"text": [
"/usr/local/envs/py3env/lib/python3.5/site-packages/matplotlib/font_manager.py:1320:
UserWarning: findfont: Font family ['sans-serif'] not found. Falling back to DejaVu Sans\n",
" (prop.get_family(), self.defaultFamily[fonttext]))\n"
]
},
{
"data": {
"image/png":
"iVBORw0KGgoAAAANSUUhEUgAAAV8AAAEEmCAYAAADfMJOIAAAABHNCSVQICAgIfAhkiAAAAAI
wSFlzAAALEgAACxIB0t1+/AAAADIORVhOU29mdHdhcmUAbWF0cGxvdGxpYiB2ZXJzaW9uIDIuMS
4yLCBodHRwOi8vbWF0cGxvdGxpYi5vcmcvNkV5AAAIABJREFUeJzt3Xu8VXP+x/HXPud0OYRK0u
WgkA+VqSaqn7uYJEzNIIzRyHXcxmVoDDLj8suYGWPGNaKMhZw5hUwSiXErCYWPInBISRfR5XRO+
/fH+p5s2Wefs3P2WXX2++mxHmfv7/qutb7r4N2371rruxLJZBIREalbBXE3QEQkHyI8RURioPAVEY
mBwldEJAYKXxGRGCh8RURioPDNM2ZWbGZPmNlyM/v3j9PiWb2TG22LS5mtr+ZedztkPySOH2+
myYzOwG4CNgdWAHMBK5z95d+5H5PAs4D9nH38h/d0E2cmSWBDu4+N+62iKRSz3cTZGYXAX8H
rge2B3YEbgP618Ludwl+yIfgrQkzK4q7DZKf1PPdxJjZNSbnwCnunnZYwMwaATCAA0PRWOAYd19jZ
gcB/wJuAi4DKoDL3f1eM/sj8HsgAawBLgB2AHZ191+HfbcDPglauHu5mZ0MXAVsBywGrnD3B0L5a
e6+X9huH+BmYDfgA+ACd385rJsCvAj0Bn4CvAKc4O6L05xbZfv/AVwS2n82UEb0B1IL4C/ufn2o3y
Mcdw9gFfAwcJG7I5nZVGB/YCWQBiyAC8P+/wlcCEwCRgD/cvcSM9sFmAYc6u4zzKwN8DZwjLTPsf
fvQ2RjqOe76fkfoDHwaiY6fwB6AV2BLkAP4IqU9a2AbYC2RIFzq5k1c/dhRL3pMe7exN1HZGqImW
1JFIKHu/tWwD5Ewx8b1msOPBXqbgv8DXjKzLZNqXYCcArQEmhIFkxVaUX002hLFPx3A78GuhOF6
VVmtnOoW0EUoi2IfneHAL8BcPcDQp0u4XzHpOy/OdHfAs5IPbC7zyP6Q+sBM9sCuBe4T8ErtU3hu
+nZFhczbDAicCf3H2Ru38J/BE4KWX92rB+rbtPAL4BbCPbsw7obGbF7r7A3WenqXMEMMfd73f3c
nd/EHgfOCqlzr3u/oG7ryLqqXfNcMy1ROPba4GHilL1ZndfEY4/m6gHjbu/4e6vhuPOB+4EDqzBOQ1
z9zWhPd/j7ncDc4DXgNZEf9iJ1CqF76bnK6BFNWORbYCPU75/HMrW72OD8F4JNMm2Ie7+LXAcc
BawwMyeMrPda9Ceyja1Tfn+RRbt+crdK8LnynBcmLJ+VeX2ZrabmT1pZl+Y2ddEPfsWGfYN8KW7r
66mzt1AZ+Cf7r6mmroiWVP4bnpeAVYDAzLU+Zzor8yVdglG+NbYluU761SV7r7RHf/GVEP8H2iUK
quPZvt+mwj25SN24na1cHdtwYuJxrTziTjhQ4za0I0vjwCuDoMq4jUKl3p3cS4+3Izu4ponLYcelbor+
GHAge7+6XAg8AVZjaNKEiulrqltDFmApeZ2Y7AcqlCgCY2fZAT2AyUW/zG6lx1g1NAP4Zbo8bCwx
NdASe3Mg2ZWMr4Gvgm9ArPvx4MmX9QmBnlJtbzW4G3nD308zsLuAOvru4KVlr1PPdBlN734ju8
b2CKEg+Bc4FHgtVrgWmE12FfweYEco25liTgDFhX2/w/cAsAc4m6tkuIRpL/U2afXwFHBnqfgVcChy
Z7m6GHLiE6GLEcQJe+ZgN1I8NjDKzWZwBYCaWX+gL9FQCOT/Hn5qZifWWotF0K1mliKxUM9XR
CQGCI8RkRgofEVEYqDwFRGJwSZ1q1xt3Pz4urf9H9fzl7HXh93M+rEi49cF3cT6kSntk2Y/dk3cTejTu
zVfpvq7qOusWz/n1/15i21duy4qecbg067tqm+kmxWihsWxt0E2cxsUj1fEckzifztl/yl8RSQ+iXozipA1
```

ha+IxEc9XxGRGBTk71i5wldE4qNhBxGRGGjYQUQkBur5iojEQD1fEZEY1HLP18waA1OBRkT5Ns7dh  
5nZfUTzUS8PVU9295ImliCaPL8f0eutTnb3GWffg/nuxbTXuvuoUN4duA8oJnqRwAXungxvPBkDtA  
PmAwPdfWlVbc3fP3ZEJH6JguyW6q0Bert7F6KXtPY1s15h3e/cvWtYKt/CftjQISxnEL2WqvKN3MOI  
3uTSAxhmZs3CNreHupXb9Q3lQ4HJ7t6B6O0vQzM1VOErlvFJLJbquHuSXevnGSjQVgyzR/RHxgdt  
sVaGpmrYHDgEnuviT0XicRBXlrYgt3f8Xdk8BovnvfYn9gVPg8iszvYVT4ikiMar/ni5kVmtlMYBFRg  
L4WVl1nZm+b2U1m1iiUtSV6TVel0lCWqbw0TTnA9u6+ACD8bJmpnQpfEYIPDsLX3SvsvStQAvQws85  
EL4bdHdgbaA5cVtmCNLtlbkR51hS+lhKfwsLsliy4+zJgCtDX3ReEoYU1wL1E47gQ9Vx3SNmshOIFsZ  
nKS9KUAywMwxKE4sytU/hKyLxqeUxXzPbzsyahs/FwKHA+yhmCAai50VNhkPDDKzRLgwtzwm  
GUwE+phZs3ChrQ8wMaxbYwa9wr4GAY+n7Gtw+Dw4pTwt3WomlvGp/ft8WwOjzKyQqHM51t2  
fNLPnzGw7omGDmcbZof4EotvM5hLdanYKgLsvMbnrgGmh3p/cfUn4fDbf3Wr2dFgAhgNjzWw18  
AlwbKaGKnxFJD61fj+vu78NdEtT3ruK+kngnCrWjQRGpimfDnROU/4VcEhN26rwFZH46Ak3EZEYa  
G4HEZEYqOcrhID9XxFRGKgnq+ISAzU8xURiYF6viliMdALNEVEYqCer4hIDDTmKyISA/V8RURioJ6vi  
EjdSyh8RUTqnsJXRCQO+Zu9Cl8RiY96viliMVD4iojEoKBA5tqJiNS9/O34KnxFJD4adhARiYHCV0QkB  
gpFEZEY1Hb4mlljYCrQiCjfxrn7MDNRdzwENAdmACe5e5mZnQJGA92Br4Dj3H1+2NfvgSFABXC+u0  
8M5X2Bm4FC4B53Hx7K0x6jqrbm76VGEYlfsulemuA3u7eBegK9DWzXsANwE3u3gFYShSqhJ9L3X  
1X4KZQDzPrCBwPdAL6AreZwaGZFQK3AocDHYffhbpkOEZaCl8RiU0ikchqqY67J939m/C1QViSQG  
9gXCgfBQwln/uH74T1h5hZlpQ/5O5r3P0jYC7Qlyxz3f3D0Kt9COgftqngGgkpfEukNrUdvgChzoT  
WARMAuYBy9y9PFQpBdqGz22BTwHC+uXAtqnlG2xTVfm2GY6RlsZ8RSQ2ubjg5u4VQfczawo8Cu  
yRplqysglVrKuqPF2HNVP9KqnnKyKxSRQkslqy4e7LgClAL6CpmVV2NkuAz8PnUmAHgLB+G2BJavk  
G21RVvjDMdJS+IplbGp72MHMtgS9XsysGDgUeA94HjgmVBsMPB4+jw/fCeufc/dkKD/ezBqFuxg6  
AK8D04AOZtbezBoSXZQBh7ap6hphKXxJFDY5GPNtDtXvZm8TBeUkd38SuAy4yMzmEo3Pjg1RwD  
bhvKLgKEA7j4bGAu8C/wHOMfdK8KY7rnARKJQHxvqkuEYaWnMV0RiU9tjvu7+NtAtTfmHRHcqBfi  
+Gji2in1dB1yXpnwCMKGMx6iKwldE4pO/D7gpfEukPnq8WGqkUcMinh3xWxo2LKKosJBHn32Ta+  
+l/vZx9TIH8cufdaOiYh13j3uR2x58gaZbFXPn1b+mfUkL1pSt5cyrH+DdeQvW76+gIMF/H7iUzxt5+  
gL7gDg2RG/pcmWjQFo2Xwrps+az8CL7ubCQYdwXL+9ASgqLGD39q3YofdQln69so5/C/XX/424lcf  
G3k8ikWDX3Tpy1Y238viY0Tx47+2Ufvrk6bPo2nzbQF4YdJT3PG360gUFFBUWMRdt/+Txm33BO  
CLzz7l2t+fz8IFn5FIJp7yLG0KdmJZDLJ7X+9lSkTHqOgsJCjTzyV408+K85Tjp3CV2pkTVk5fc/4B9+uKq  
OoqIDnRI7EM/99F2vfipJWTenyi2tIjPns16wJAJcOOYy3vJTjLr6b3dptz9+HDqTfWf9cv79zTzgy/2gh  
W4WwBTh0yN/Xf37wL6fxxJS3Abhp9GRuGjOZgH4HdOa8Ew9W8NaiRV98zphRdzLmmdo3LiY35  
97Ms888TBduvdkv96Hcdavjvxe/b33OZADDu1HlpFgznuZOO20lfzr6dcAGHbJWZz6m0vouf/BrPz2  
m/UThj8x7gEWLijl389Oo6CggCWLv6zz89zU5HP46m6HLH27Kpono0FRIUVFhSSTSc44dj+uv+tpks  
nonuovlOZPN+6+cyumvO4AfDB/ITu1aU7L5lsB0LZIU/ru14l7H3057XGABNGIA/fejSeef/sH6wb23Y  
ux/3mj1s8t35VXVLBm9WrKy8tZvWoV223fGuvUhtYIO/2g7hZbNlkfHKtWrVz/+cM571NRXkHP/Q  
9eX69x8RYAPPzASE4777L1Ydy8xXZ1cVqbtqf22GzofDNUkFBglcfGsonk4fz3KvvM23Wx7Qv2Y5j+  
nTnpQcu5bFbzmaXHaP/qd754DP6H9IVglO67cSORzVdvumANz4u6P5w82PsW5d+odgft67C1Ne  
d1Z8u/p75cWNG/Czffbgsczk3iW+adlqzb8+rRzOWq/zhzey9hyq63ptX/vjNs8P/EJjil0by4cMpCRI0  
cC8MlHc9lq62343Vm/5sQj9+fm/72SiokAD775CMmPfulg35+EOefcgyffDQv5+e1qcvF48Wbi5y  
Gr5n1NTM3s7lmNjSxx6or69Yl6XX8cHY97Ar26rwTHXdpTaOGRawpW8t+J/6Zex95mTuHnQjAX+6  
dRNOttuDVh4Zy9vEH8paXUl6xDoBFS1bw5nufVnmcgX27p+3dHnHAnrwy80MNOdSyr5cvY+qzE3  
j8hbd4+pX3Wb3qWyY8NibjNgcdfhTjnp3GjXc+wJVXXglARXkFb057hQsuv5ZRjz3PZ5/M58lxDwBQ  
VIZGw0aNGD1+CgOOG8Q1I52b8/Pa1Cl8c6Caqdc2e8u/WcXU6XPos09HPlu4IEefjXqijz/3Fp07RP  
NprPh2NWde/S96HT+cIveOpkWzJsz/7CsAjxwT95/6o+MHn4KB+29GyOvHbR+38232ZK9OrXj6R  
dn/eC4xx7WnX9ryKHWvf7fKbQp2YIm27agqEEDDj7sKN5+4/UabfvTHvsyb948li35ipat22Cd9qRkx  
3YUFRVxUJ8jeH92NHTUsUbevf9ORAF95z3Z2fabV4oKcJlaqlPcnk2aadey+Hxcq5FsyZs06QYgMaN

GtC7p+HzF/LElLc5qMduAOzfvQNZp1kEwDZNimlQVAjAKb/Yh5dmzF0/jLBr3yvZ/YhhDBp6L1Omfc  
CpV4xef5xf/qwbT784izVI5amHZ+smjdmv+67rL8JJ7WnVpoR3Zk5n9aqVJJNjpr38Au133a3K+p/O/  
3D9GP/7s2ZSVIbGNs2a0/EnP2XF8mUs/WoxANNenkr7XQ2AA392BNNfngrAjNdeYsf2u+T4rDYDe  
Tzmm6j8D6i2mdkxQF93Py18Pwno6e5V/l1r9tzPk512bZOT9ohUZ9iwYYwZM4aioiK6devGPffcw5  
133smf//xnvvjC1q2bEm/fv245557uOGGGxg9ejQNGjSguLiYG2+8kf322w+ASZMmcfHFF5NMJun  
evTt33XUXDRs2ZNmyZZx44ol88sknNGnShDvuulMuXbrEfNbZmf7RcvZqv02txeDOF03IKoA+/Fu/e  
hPBuQzfY4HDNgjfHu5+XIXbFHc7NzeN2cSsevMWirvlx3jfi4/84OnMemmv9tsw/aPlcTejTtRm+O5y  
8dNZ/T8/76+H15vwzeV9vLVNvSYiAkA9u4aWlVYg7/qp14DPiKZeOyGHxxORzUx9u4MhGzm74Fb  
N1GsiliQS2S31SU4fL65q6jUREcgvnq/mdhCR2ORx9ip8RSQ+BVm+l60+UfiKSGwUviliMdCwg4hIDH  
TBTUQkBgpfEZEY5HH2KnxFJD7q+YqlxKC2s9fMdgBGA62AdcBd7n6zmV0NnA5Uvjjv8vAQGGb2e2  
AIUAGc7+4TQ3lf4GagELjH3YeH8vZEU+Q2B2YAJ7l7mZk1CsfuDnwFHOfu86tqa/2anVhENis5eJNF  
OXCxu+8B9ALOSXmJw03u3jUslcHbkWjemU5AX+A2Myus5mUQN4R9dQCWEgU34edSd98VuCn  
Uq5LCV0RiU9tzO7j7AnefET6vIjPxpM2GTfoDD7n7Gnf/CJhL9CKItC+DMLME0BsYF7YfBQxl2deo8  
HkccEion5bCV0Rik8t3uJlZO6Ab8FooOtfM3jazkWBWLS1BVJfplgayqoq3xZYFiYOSy3/3r7C+uWhfl  
oKXxGJTUFBlqulpsysCfAw8Ft3/xq4HdgF6AosAP4aqqbbaXljjPtKy1dcBOR2OTiZgcza0AUvA+4+y  
MA7r4wZf3dwJPha6aXPqQrXww0NbOi0LtNrV+5r1IzKwK2AZZU1U71fEUkNrU97BDGWecA77n7  
31LKW6dU+wVQ+Wrw8cDxZtYo3MXQAXidJdBMfIDooty4909CTwPHBO2Hww8nrKvweHzMcBz  
oX5a6vmKSGxy0PPdfzJeMfMzoayy4nuVuhKNAwwHzgTwN1nm9IY4F2iOyXOcfKADOrfBLEITAy  
5WUQlWEPmdm1wJtEYU/4eb+ZzSXq8R6fqaEKXxGJTW0/ZOHuL5F+7LXKlZq4+3XAD970WtXLINz  
9Q6K7ITYsXw0cW9O2KnxFJDZ5/ICbwldE4qPHi0VEYqDwFRGJQR5nr8JXROKjnj+ISAzyOHsVvilSH  
71AU0QkBgV53PVV+IplbPI4exW+IhIfXXBLw8zOyLShu99V+80RkXySx00+GXu++2dYlWQUviliYo6j  
nm4a7n1SXHRGR/JPH2Vv9mK+ZNSaaQm1ndx9sZgaYu4/PeetEpF5LpJ2ALD/UZDL124GtgL3C98+  
Bq3PVBHJHwWJ7Jb6pCbh29XdLwHKYP0bQQtz2ioRyQu5fHmpq4mt5qtSf1iZo1IP1mxiEhWCutb  
dzYLNen5vmRmlwKNzGw/ovfXP5XbZolIPkgkslvqk5qE7+VAMbAK+AfwFnBVLhslvlBww4ZuHsZ8  
MewiljUmnqWp1mpya1mWwJ/AHoTPVzxHHC9u3+b47aJSD2XzxPr1GTYYSTQFrgUGAq0Bu7NZa  
NEJD8kslzqk5rc7dDZ3TulFH/BzGZXWvtEplZqexzXzHYARgOtgHXAXe5+s5k1B8YA7YD5wEB3X2pm  
CeBmoB+wEjjZ3WeEfQ0Grgi7vtbdR4Xy7sB9RNfCjgAXuHuyqmNU1daa9Hw/DjutPLnmwlc12E5E  
JKMcPGRRDlzs7nsAvYBzzKwj0d/aJ7t7B2By+A5wONAhLGCQPVRWmXPDgJ5AD2CYmTUL29we6lZ  
u1zeUV3WMtDLNanZ9+LgceMvMKh8nPgp4tppfglHtWq75+vuC4AF4fMKM3uPaNi0P3BQqDYK  
mEI0bUJ/YLS7J4FXzaypmbUOdSe5+xiAM5sE9DWzKcDW7v5KKB8NDACeznCMtDL1fCvCMpeoi7  
0kLKOAZ6r/NYiZjBl+3zNrB3QDXgN2D4Ec2VAtwzV2gKfpmxWGsoylZemKSfDMdLKNkvZlZk2FBH  
5sXL1hJuZnQEeBn7r7I9H84Glla4ByY0oz1qN3mRhZr2BrkDjyjJ3v77qLUREqpeLByfMrAFR8D7g7o  
+E4oVm1trdF4RhhUWhvBTYIWXzEqLjw0r5bghisnxKKC9Juz/TMdKq9oKbmV1LNPB8GbAL8Ftgz+  
q2ExGpTm3fahbuXhgBvOfuf0tZNR4YHD4PBh5PKR9kZgkz6wUsD0MGE4E+ZtYsXGjrA0wM61aY  
Wa9wrEEb7CvdMdKqSc93ANG4yXR3HxJu5fhHDbyTEckoBw9Z7AucBLxjZjND2eXAcGCsmQ0BPg  
GODEsmEN1mNpfoVrNTANx9iZlDA0wL9f5UefENOJvbjV70ixkOEZaNQnf1e6+1swwsyJ3/9TMdq  
zBdiliGdV29rr7S1TdST4kTf0kcE4V+xpJ9JDZhuXTgc5pyr9Kd4yq1CR8V5hZMfAKcK+ZfU5087Kllyl9S  
3ybLyUZNHrI4kShsLwbmAY2opjstlIIT+TylZE1mNau8krcGvT5IRGpRpk+sk+kJtwfJcP+au5+QkxaJSN  
7I4+zN2POt80eIl067pa4PGZt8OddkcpPuP98sdSrZou4mbHbyecw30xNul+qylSKSf2py0am+qtETb  
iliiZDPL9BU+IplbPI4exW+IhKffB7zrdGQI5kdaGZnhc8tzWyX3DZLRPJBDiZT32zUZGKdS4DriR6ygG  
hms/ty2CYRyRP5/JBFTXq+JxFNrfYNgLt/AjTNYZtEJE8UJBJZLfVJTcj3lbuV3aBMczulyl9WkOVSn9Tk  
gltpmOcyGeavvAx4L7fNEpF8UM86s1mpSfieD/yLaAq1lcCrwPG5bJSI5If6NpSQjZpOrNPbzLYCctx9  
ee6bJSL5II+zt/rwNbM+G3wHwN2fyVGBRCPFNW3+8eyUJNhh9S3GDcmem/bTEDhKyl/inq+Gbj7  
/qnfzWxP4LyctUhE8kYed3yzv3vD3d8BuuSgLSKSzXZ/IOfZDvmWwDsXZPtRESqk88932zHfMuJ3u

M2MDfNEZF8ovCtgpkVANE5+3/qqD0ikkfyeVazjOhr7uvM7CpA4Ssita62e75mNhI4Eljk7p1D2dXA  
6cCXodrl7j4hrPs9MASoAM5394mhvC9wM1AI3OPuw0N5e+AhoDkwAzjJ3cvMrBEwGugOfAUc5+  
7zM7W1JhfcZphZ95qduohlzeVgVrP7gL5pym9y965hqQzejkrP63YK29xmZoVmVgjcChwOdAR+Fe  
oC3BD21QFYShTchJ9L3X1X4KZQL6OahG8v4FUze9vMXq5carCdiEhGtT2rmbtPBZbU8PD9gYfcfY2  
7fwTMBXqEza67f+juZUQ93f5hbpvewLiw/ShgQMq+RoXP44BDQv0q1eSC22U1PBERkawU1t1UZ  
eea2SBgOnCxuy8F2hLNVVOpNJQBfLpBeU9gW2CZu5enqd+2cht3Lzez5aH+4qoaVGX4mtklDx/i7p  
NreHlillkppqJt7d28HrgGS4edfgVMh7cGTpB8RSGaoTzXr0srU8+2WaUMRkR+rLm52cPeFIZ/N7G7g  
yfC1FNghpWoj8Hn4nK58MdDUzlpC7ze1fuW+Ss2sCniGaoY/6tv8xCKyGamLd7iZWeuUr78AZoXP  
44HjzaxRuluhA/A6MA3oYgbtzawh0UW58e6eBJ4HjgnbDwYeT9nX4PD5GOC5UL9KmXq+e5rZojT  
ICSDp7i0z7VhEpDq1PZ+vmT1I9NqzFmZWCgwDDjKzrkTDAPOBMwHcfbaZjQXeJXqA7Bx3rwj7OR  
eYSHSr2Uh3nx0OcRnwkJldC7wJjAjl4D7zWwuUY+32jnPE8lk+nA2s9IAv6o2dPePq9t5tlaXZx4jqS8  
aF8Hq8urr1QdV/fdV3xQ3SLBqbd6ca60I5t2vfZzVL+30njvVm6cyMvV81+QiYEVEKulNFumV1VkrR  
CQv5XH2Vh2+7t6rLhsilvkn6/4a2pIEYmNJtYREYIB/kavwldEYISonq+ISN3L4+xV+IplfDTmKyISA93  
tlCISA/V8RURikL/Rq/AVkRip5ysiEgON+YqlxEA9XxGRGORv9Cp8RSRGesJNRCQGeZy9C18RiU8ijwc  
eFL4iEhv1fEVEYICgnq+ISN1Tz1dEJAYKXxGRGOiCm9SqZcuWcfaZp/Hu7FkkEgnuuGskz06ayMgRd  
7Ndi+1IJODqa66n7+H9mPzsJK68fChlZwU0bNiQ62+4kYMO7h33KeS91atX87PeB1K2Zg3I5eUM+  
OXRxDnsj+vXX/Tb87h/1H18uXtF+rKH/z2W6675I4IEgj1/0oX77n8AgCaNi+jUeU8AdthhR8Y9+njd  
nswmrKCWs9fMRgJHAovcvXMoaw6MAdoB84GB7r7UZBLAZUA/YCVwsrvPCNsMBq4lu73W3UeF  
8u7AfUAxMAG4wN2TVR0jU1sVvjwlyYUX0KdPXx4cM46ysjJWrlzJs5Mmct4FF3LhRZfQuAhWl0d1t  
922BeMee4I2bdowe9YsjriMD78+LN4T0Bo1KgRTz8zmSZNmrB27VoOOWh/Dut7OD169uKNN6a  
zfNny79WfM2cON/55OJNfellmzZqxaNGi9euKi4t5bfqbdX0Km4Uc9HzvA24BRqeUDQUmu/twMx  
savl8GHA50CEtP4HagZwjSYcBeQBJ4w8zGhzC9HTgDeJUofPsCT2c4RpXyeV6LnpJ666956aWpnHz  
qEAAaNmxi06Znq6zftVs32rRpA0DHTp1Ys3o1a9asqZO2StUSiQRNmjQBYO3ataxdUXSCSoqKvjD  
0Eu59n9v+F79u+++mzPP/g3NmjUDoGXLlnXe5s1RQSKR1Vldd58KLNmguD8wKnweBQxIKR/t7kl3  
fxVoamatgcOASe6+JATuJKBvWLe1u7/i7kmigB9QzTGqPvdqz0ay8tGHH9KixXacMeQUeu3VjbPPO  
l1vv/0WgDtuu4W9u/2EU089laVlf/g3kkcfeZguXbvRqFGjum62pFFRUUHPvbqxU9vtOeSQQ+nRoy  
d33HYLRxx5FK1bt/5e3Q8++IC5H3xA7wP348D9/odnJv5n/brVq1ezb6+9OXC//2H844/V9Wls0goS  
2S0baXt3XwAQflb+ydgW+DSIXmkoy1RemqY80zGqllPwNbORZrblzGbl6hibovLycma+OYPTzzybV  
6e/yRZbbslf/jyc0888m3d9Hq+9MZPWrVs9HcXf2+7d2fP5orLL+OW2+6MqeWyocLCQl6b/iZzPvq  
U6dOn8dKLU3nk4XGcfc55P6hbXl7O3Llzmfs84y6///4zVmns2zZMgB83sf899Vp3Df6AS695EI+nD  
evrk9lk5Xl8p9aP/wPJTeifKpsud7H9F4SF5pW1JdBFG3AAAKRkIEQVRC25ISevTsCcAvjj6GmW/OY  
Pvt6ewsJCCggJOP/10pk9/ff02paWIHHfL7hn5Gh23mWXuJouVWjatCn7H3AgL0x5nnnz5tJ5jw7s  
3qE9K1eupPMeHQAOksnhyl//nAYNGtCufXt2282YO3cOwPphpfY778wBBxzEWzM1/lspkchu2Ug  
Lw5AB4WflgHwpsENKvRLg82rKS9KUzZpGIXIWvIWMvdR7rVq1oqRkz5wB2DKc5PZfy+OLFiwYH2  
dRxx99I6dOgPRnRG//PkR/Ona/2WfffeNpc3yQ19++eX6nuuqVat4/rnJdPtpd+Z/uoD353zE+3M+Y  
osttmDWe1HADhgwgKlTpgCwePfi5sz5gPbtd2bp0qXrx/AXL17MK6/8I9336BjLOW2KElkuG2k8M  
Dh8Hgw8nli+yMwSZtYLBW6GDCYcfcysmZk1A/oAE8O6FWbWK9wpMwiDfaU7RpU2qbsdGhbW  
/q0ncbj1ln9y6uATKSsrY+edd+bee+/l/PPPZ+bMmSQSCdq1a8edd95J4yK4545bmDdvLjdcfw03XH  
8NAM8880w9umCzef4LXbb4CwYPHkxFRQXr1q1j4MCBHD3gqB/UK24Qnd9hhx3GM888Q/cunSg  
sLOQvN95ISasWvPzyy5x55pkUFBSwb06fj90KD/t0qmuT6fWrfq70X/LTqsmF9GyYWPYAgcBLcysl  
OiuheHAWDMbAnwCHBUqTyC6zWwu0a1mpwC4+xIzuwaYFur9yd0rO5Jn892tZk+HhQzHqFlimaz  
dX2YqM2sHPFI5v111VpDv/PjJ5iT1VrP6Lpf/fW1Kihskaj2YNIXFDWovMV+duyyrX1qvXZtunn+ap7F  
J9XxFJM/UmyjNnsJXRgktz48X5/JWswEBV6KPVhrGQkRE1qujux02STnr+br7r3K1bxGpH+pZnmZF  
ww4iEhu9OI5EJAZ5nL0KXxGJT5nr8JXRgkUx+mr8BWR2OTzrWYKXxGjzcZ8RURikMfzq/AVkRjlc



oqfEUKNhrzFRGJgcZ8RURioPAVEYmBhh1ERKGgnq+ISAzyOHsVvilSozxOX4WviMRGY74iljHQmK+I  
SAzyOHsVvilSoxykr5nNB1YAFUC5u+9lZs2BMUA7YD4w0N2XmlkCuBnoB6wETnb3GWE/g4Erwm  
6vdfdRobw7cB9QDEwALnD3ZLbtzNkLNEVEqPI8p8sHOzuXd19r/B9KDDZ3TsAk8N3gMOBDMe5  
A7gdIIT1MKAn0AMYZmbNwja3h7qV2/XdmHNX+IplbAoS2S0/Qn9gVPg8ChiQUj7a3ZPu/irQ1Mxa  
A4cBk9x9ibsvBSYBfcO6rd39ldDbHZ2yr6wofEUKPoksI5pJAs+Y2RtmdkYo297dFwCEny1DeVvg05R  
tSONZpvLSNOVZ05iviMQmR7ea7evun5tZS2CSmb2fsQk/INyl8qyp5ysisUkksltqwt0/Dz8XAY8Sjdk  
uDEMghJ+LQvVSYIeUzUuAz6spL0ITnjWFr4jEprZHHcxsSzPbqvIz0AeYBYwHBodqg4HHw+fxwCAzS  
5hZL2B5GJaYCPQxs2bhQlSfYGJYt8LMeoU7JQal7CsrGnYQkfjU/qjD9sCjZgZRvv2fu//HzKYBY81sCP  
AJcGyoP4HoNrO5RLeanQLg7kvM7BpgWqj3J3dfEj6fzXe3mj0dlqwlksmNGq7lidXlGzd2srIpXASry+  
NuRd3YIP77yqXiBgIWrc2bc621yPz4qzVZ/dJ22rZRVxkuQz1fEYmNHi8WEYIBHmewldE4qOer4hIL  
PI3fRW+IhKbH/nl8GZN4SsisdGwg4hIDPQmCxGROORv9ip8RSQ+eZy9Cl8RiY/GfEVEYqAxXxGROO  
Rv9ip8RSQ+eZy9Cl8RiY/GfEVEYICQx+mrN1mliMRAPV8RiU0ed3wVvilSH91qJiISA/V8RURikMfZq/  
AVKrljcfqfEUKNhrzFRGJgcZ8RURikMfZq/AVkfgk8rjrj/AVkdjkcfaSSCaTcbdBRCTvaG4HEZEYKHxF  
RGKg8BURIYHCVOQkBgpfEZEYKHxFRGKg8BURIYEesqhDZtYXuBkoBO5x9+ExN0I+JDMbCrwJLHL3  
znG3RzYf6vnWETMrBG4FDgc6Ar8ys47xtkpwX1A37gblZsfhW/d6QHMDfcp3b0MeAjoH3Ob5Ed  
y96nAkrjblZsfhW/daQt8mvK9NJSJSB5S+NaddFOlaGINKTyI8K07pcAOKd9LgM9jaoulxEx3O9SdaU  
AHM2sPfAYcD5wQb5NEJC7q+dYRdy8HzgUmAu8BY919drytkh/LzB4EXok+WqmZDYm7TbJ50Hy+  
liixUM9XRCQGCl8RkRgofEVEYqDwFRGJgcJXRCQGct/NmJnNN7P3zewtM5tIzsfX4n47h88TzGyXa  
uoPMLMeG3msk81sXHXtqGYfSTNrkuvx25nZ4my2EalNct/N3zHu3gU4CbjXzFpsWCHMqLZR3L2f  
u8+rptoAoomDRKSG9IRbPeHub5rZCqC9mR1J9ATdl0TTVw4xs4XAP4EdgWLGQXe/HsDM9gduA1  
YBr5lyD4WzZqEodPdZtYW+AfqIax+EJgB/Bw41MxOA/7m7qPNbDDwG6L/xpYDZ7u7m1nD0l6D  
iJ70e78m52dmF4dzKgJWh/3NTKlyiZn1AbYFLnf3h8N2PYHhwNah3IXu/IRNjimSSwrfesLMDgYaA3  
OATsB+QJfKXquZTQKucfepIQAnm9k0YCrR9JYnuvsUMxslnFfYf4FTHD3o8M+W7j7YjMbD0x391t  
C+f7AQOAAAd19jZocDI4F9gTOB9kBnoEE4/vwanOJod/9r2P+hwB1Ar5T169x9HzMz4GUzexEoC/X  
6ufsCM2sNTKvJUIZril8N3/jzGw18DVwtLsvi/KHl1KCd0uinuZ2YR3AVsAewEJgpbtPAXD3sWZ214Y  
HCWOq+wA/qyxz96rGTI8CugCvheMlgGZh3cHAKHdfC6w1s38R/UFRne5mdjnQHFgH7LbB+hGhT  
W5mM4iCuZwo6J9OOe8ksCug8V6JlcJ383eMu89KU/5NyucCotDZO4TeembWJQdtSgAj3f2qKtZlJf  
TUxxH1pGeYWRuilYtMx0+Gn2+7+wFp9tku23a1CZdcMsD7r4CeBEYWllmZjuYWSuiMddiMzsglB8  
DbJNmH98ALwMXpuyj8uLe1xts8wQwyMxKQr1CM+se1k0GTjKzljMrpmYzuzUm6ihUTkb/mzR1T  
gnH6gB0BV4L7e0QhmQq27y3mWX9B4BibVP45o8TgY5m9o6ZvQOMAZq6+xrgV8CtZvY6sBfwSR  
X7+DWwb7it7S2gcv+4ETzGymmQ0Kr9b5AzA+1JvFd69MuivsfzbwJPBCdQ1396+Bq4jGa6cC36a  
ptsbM/hv2eaa7L3L3pUQXA4eF2/HeA65ml3rflrVNs5qJiMRAPV8RkRgofEVEYqDwFRGJgcJXRCQG  
Cl8RkRgofEVEYqDwFRGJwf8DD56N48htMrEAAAASUVORK5CYII=\n",

```
"text/plain": [  
  "<matplotlib.figure.Figure at 0x7f65cee69f28>"  
]  
},  
"metadata": {},  
"output_type": "display_data"  
},  
{  
  "name": "stdout",  
  "output_type": "stream",  
  "text": [  

```

```
"2019-10-05 22:00:12.123777\n",
"total time all features xgboost and RandomOverSampler:481.5778818130493\n"
]
},
{
"data": {
"image/png":
"iVBORw0KGgoAAAANSUUhEUgAAAYoAAAEWCAYAAAB42tAoAAAABHNCSVQICAgIfAhkiAAAAAL
wSFlzAAALEgAACxIB0t1+/AAAADlORVhOU29mdHdhcmUAbWF0cGxvdGxpYiB2ZXJzaW9uIDIuMS
4yLCBodHRwOi8vbWF0cGxvdGxpYi5vcmcvNQv5yAAAIABJREFUeJzs3Xl4U2XwPFvlu4LZakom6D
iGQUVFQERRAEVEHBHcRt3HcUNUVFQcV8BQdx+6qijjo+MyjgKClloKKoKoCC4vAiIUWQoU6N4mu
b8/bgqldkmhyU3S83keHprkJvfkNs2573mX67lsC6WUUqombqcDUeopFd00USillKqVJgqllFK10kSh
lFKqVpoolFJK1UoThVJKqVppolAhE5ELRGS203FEExEpeJEDHNhvexGxRMQb6X2Hg4j8JCIn7MHz9
DMZAS6dRxGbRGQ10BLwAwXAR8AIY0yBg2E1KBHpCTwAHAMEgC+A240xPzsUz2fA68aYFyO0v4
OBB4ETgQTgD+AVYBLQFvgdSDDG+CIRT01ExAI6GmNWhHk/7YmS99zYalsitg0xxqQDXyAjTscjm
ePVHdWLCLHARoBD4BWQAdgCfBlOM7go+3MXEQOBL4B1gKHGWOaAOcAXYGMbt6XY+892o67
qp62KGJUsEvXhTFmTvD2Y0AnY8ypwdtJ2Gejw4Ak4H/AzcaY4uDjpwH3AgcAucB1xpiPRKQJMAEY
hH0W/zJwjzHGLyKXBPfZS0SeAwqMMaMqxQB8LkxZoKitAKeAo7HbvFMNMZMDm43DugMIABD
gZfVz9JfZB6w1BhzbZX7ZwK5xpiLg6WK14FngJHB/Ywxxvy7rmNQ6bIPATcDHwM3AK8B3QEv8CV
wjTEmR0QeBEYD5YAPeMUYM6Ly2bSivAIUAu2D7/tn4HxjzMpgPCcH97cv8G+gE/BadS0UEXkdaFr
x+6zm8fbYZ9eXAPcDqcFj/GDw8W7YLY9DgGLgV8HjXBZ83AJGADcBXmNMBxGZBJwJNAF+A24yxs
wLbu8BbgcuB/YBlgOnB99Hb6AlsIDLjTFvichg7NZg++BxuMY82PwtVYDzwIXAAKkAsIfp6DsT8DH
ByM/d/GmJEisga7JVUYPAwnBZ9/hTGmV/C1OwFPAkcHf1eTjDEPVXcMveiorREHRKQNMbd7j63
Co9h/aF2Ag4DWwN3B7bsB/wJuBbKwv9RWB5/3KvYX4UHYrZSTgSuq2e0bwLki4gq+ZtPgvt8RETc
wDbsF0BroB9wklqdUev5pwLvB/f+7yvtJBXoC71Sz37exvyAq7Au0CO7n78D/iYjUdQwqPbcZsD9w
Ffbfw8vB2+2wv6SmABhJxgDzsMt76caYEdXEBjAcOwE3xf59VHxxtwi+3zuA5oAjvsea9A9uX5de2F
+W/YC7ReSQ4P1+7ATYAjg2+Pi1VZ57OnZSPDR4exH2sWqG/ft9R0SSg4+NDL63QUAmcBlQZlw5P
vj4EcHj8palHAX8E7g6+F6fB6YGE3eF4cCpQFY1ZaRJ2F/wmcCB2L9zsD+nBJ+Tboz5uvKTRCQDmIN
dhm2F/Tv/pNqjpupFm32x7f3gmWE68ClwD0Dwy/tK4HBjzNbgfQ9h//HfgX1W+E9jzmfB11kX3KYI
dsLjCrY8CkVklvaX6PNV9jOP+wyyN3bfgdnA18aYP0WkO5BtjLkvuO0qEXkBOA+YFbzva2PM+8Gfi6
u8djPsL+311bzn9dhffpXdZYwpBT4XkQ+BYSLyQB3HAOWwOz3B51bE8d+Kfw22luZWE0Nt3jPGLA
w+/9/YrTOwv2B/Msa8F3xsMjCq+pcA7C/Y6t5/VfcGf1dLRGQJcATwizFmcaVtVovl80Af7LPtCg9XH
BsAY8zrIR4bLyJjsZPQEuyThduMMSb4+JJaYroSeN4Y803w9qsicifQA/g8eN9kY8zaGp5fDhwkli2M
MZuBBbXsq7LBwAZjzPjg7RLs8p3a55ooYtvpwaZ6H+wwwBbANIAbuxSxeNfJNS7AE/y5LTCjmtfbH7
vTDh2I57mx6+S7McZYIvlf7DPDL4DzsUs5Fa/TSKS2VXqKBzu5VKjpSwlgD/tLfd/g1yqP7QdsrrytMa
aw0u0/sM8m6zoGYJewSipuBFsyE4EB2C0CgAwR8Rhj/LXEW9mGSj8XYSdxgjHtfM/B45dTy+tswX
6ve7S/YEf4BOw+jVtsv/XFVZ672+9ARG7BTgitsE8CMtmVINsCK00IB+zf/99F5PpK9yUGX7fafVdxO
XAf8Kul/I6dDKeHsN/6xKjqQRNFHDDGfB6sjz+BXU7YjH123MkYs66ap6zFbtJXd38p0CLEUSVvArNF
5BHsEsYZIV7nd2NMx1qeW2PnmDGmUES+xu68rXpGP4zdywlNRSStUrJoByyj7mNQXQy3YJ9Bdzf
GbBCRLsD32Amm1phDsB5oU3Ej2OprU/PmzAHOWi6F7YInsWMfbozJF5GbsFt9le18PyLSG7sPoh9
2yycglnnseu8Vn5lllex7LfbgRX9JDWr7/f8GDA+WMM8E3hWR5rU9p9J+h4cQn6onTRTx40nsEkM
XY8wPwVLPRBEZYYzJCKtg7GmFnAS9hf8NOxv4j3AzKMMb8Gx6SPF5G7sDuH0wBtjDGfV92hM
eZ7EckFXgRmGWMqWhALgR0icjswGSjD7IRNMcyCvH9jAZmiciv2F+WXuwv8mOxh8tWdm+wtN
Edu/xwT/CLrrZUJOM7OSyTUSaESzlvbIRu/N/T3witBGR04HpwDXyFSQ1uQdYJCKPA+ODiesgYbX2
```

J3RdMoAdQIGI/A34B/aghdq29wW38YrlaOwWRYUXgftF5GfsvpfDgHXGmC3sOi4VfWQvAP8TkTn  
Yn4VU4ATgC2NMfl2Bi8iF2J+n3EqUn8wtkBwX8ureep0YElwKT6L3Yo5tFIJTO0h7cyOE8aYXOwO6  
ruCd92O/Ye7QER2YJ+hSnDbhcCl2GWW7dh14/2Dz7sY+w/sZ+wSOLvUXgJ5E7vj9Y1KsfiBldgdo79j  
n92/iD2ajtT3Mx84BfuMcyj2SelloFfwjLPChmCcf2J3il9jjKkoV9V4DGrwJJASjHcBdqdoZZOAsOUkL9  
jHELJgrf0c4DHsstKhwlFYLbjqtl+JnRTbAz+JyHbs/pNvgTq/bLH7P84PbvsC8FYd288CZmJ/Af+BXd+v  
XB6agN2pPBs7Ab2EfazATl6visg2ERImjPkWu59iCvbbvZgX26KxQDcB+zwXYx/w8Y0yJMaYle3DAI8F  
99aj8pGASOgn7s7cBe+TWifXYr6qBDo9VMatiiKsxprYSTIQKlVygAuMMfXtMFcqorT0pFSEBlcHf4  
Nd3roVu/4f6ogepRwTtkQhIv/ErhdvMsZ0ruZx3FazchD2a11LjDHfhSsepaLAsdgluorS3ukVeyCVimZ  
hKz2JSMWM3H/VkCgGAddj4ru2BNsuoclGKWUUnssbJ3ZxpgvgK21bHladhKxjDELgCwRCWXcuFJ  
KqQhyso+iNbuPqsgJ3lfrbFTLsiyXy1XbJkopFdcAdi4EVavrv7fH39AaaXdxFFxPM9bV+/x6F6eTiaK6o  
Ousg7lLnJzQxkdGP+yszP0WATpsdhFj8UusXosLAS2bXKxdq2LtWvdrF3rZs2aip9d5OS4KSmp/nu/  
RYsAh/+tlMusl/iil16W03t/D/vudu1fxOjkocrCn3Fdogz0WXiml4pplQW7urkSwZo27UlKw/68pETRv  
HuBvfwvQrl2Atm0t2rbd9XObNgGaLF9Mxk3X4f3lZwqGFVJ86bXsvnJN/TmZKKYCI4LrBXUHthtjQlk  
ETSmlopplwebNtSeC4uLqE0GzZgFEak4E6enVPg2Kikh79EFSnn8aVyBA8cWXUXLeBQ3yfsI5PPZN7  
Gn7LYKLn92DveAcxpjnsBelG4Q9a7Mle6awUkpFPcuCLVsQJ4JdJaKK+4qKqk8ETZtadOwYCCYAK5g  
EdiWFGHnBLRIWfEXGdf/As/p3/O07kD9xCuXH9d7Ld7L2BKFMabWxbmMMRZwXbj2r5RSe8qyY  
OvWmhPBmjU1J4KsLlSDD6w5EWQ06PUJba6tW3Gv+YOi626k8NY7IDW1QV9fZ2YrpRody4K8PKo  
pC+1KBIWF1SeCjk0sDjig5kSQmVnt0xpc4uyZlB91DFaLFpQNGszWrxYTOKC6RaH3niYKpVTcsSzYtg  
3WroUIS7zVjh4qKKg+EWrkWLRvXzURWMFkEKBJyEtbhodr82bSx95G8nvvUnL2ueQ/8wJA2JIEaK  
JQsWo7dthzZq/dhTbt93k51ckgpTdnpeebn/5VvYSAqp3GTieCGlKwSe+9Q/qY23Bv3Ur50V0pumF  
kRHatiUlPZV27IA//ti9g7hyX8GOHdW3CNLSKhKBxcEHe2nRomS3ELGTJhBrc3bd6/8kfdSNJH08Cy  
s1YL7H6b4imvAs3fDXkOliUlP5Ygd09h59I9dlti+vfvpv89RUi/33D9Cjx65yUOVEkEW1KxHYE+7KI/iu  
wsNVUEDi53Mp630C+eMnEWjflaL710ShlAqL/Hx2KwtV7TTetq3mRNCuXYBu3apPBE2bxl6LYE94  
Vq2AKlL8h3bc3/Fg8j6ai79TZ0fevCYKpdQeKSioPRHk5dWcCnq2DdC1a3WJwKJZM6tRJIIa+XykPP8  
MaY8+gL/DgeTN+QISEvB3PsyxkDRRKKWqVVBAlbLQ7p3GW7dWv/h0SoqdAI46yto5bLRY53Hz5o  
08EdTC89MyMm6+joQvfifQlPvCW24Dr/Nf085HoJRyRGEhfXkpVDkRbNlSfJITrYtQJcuvmoTQYs  
WmgjqrbsU1ImPkzp5Ai6fj5JzzqPg/oexmjV3OjJAE4VScאוCHJy7A7i6hLB5s3VJ4KkJDsRHH64b2d  
ZqPJ6Q9nZmggamquslOS33iDQcl8KnniSsn4nOx3SbjRRKBWjiourJgl7CaxfD6tWpdWYCBITLdq2tej  
cefdEUPFzdraFO2yXNFM7FRbi/fVnfEcfG5WRyfbX3iKw//5YGRGa2IOPmiiUilFxbBunauaSWV2csj  
NrSkRQJs20KmT7y+zivffXxNBNEj44jMyRt6Aa/s28uYvJNByX0c7q+uiiUlph5SU2Ingr5PK7J83bar+2  
zwhwaJNG4tDDqmaCOz5BZ06pbNIS2GE340KhWv7NtLuvYuU11/F8ngovu5GApnROhV8F00USoV  
JaWntiWDjxuoTgddrJ4LevatPBPvsY9U6IVdbC9EpeaHpN92M56NG/B1Ooz8J6fgO+Jlp8MKiSYKp  
fZQRSKo3FFc+ecNG2pOBK1b24mg8qqjFX0F++5beyJQMciySPm/Z3DnbaXwzrspuu5GSEhwOqqQ  
aaJQqgZlZTUIArtlsGGDC8v66/Afj8dOBL16+XbrH6hIBPvtp4mgUbAsvEu+x9fIKHC5yJ84BVdZGf6D  
xenl6k0ThWq0ysvtRFC5HLT76KHaE0HPnv4aE0EUzJFSDnLnrCX91ptI/HQO26bPxndM94ivz9SQ9  
Oos4lZ5Ofz5567F5qrOJVi/3kUg8NdE4HbbieDYY/1UvWZx27YBWrXSRKBqEAIQ/MpLpN1/D+7CA  
sr6nEig5b5OR7XX90OuyPbPtysR5OXBtZ8l7pYI/vyz5kTQqpVF9+41J4IYKh+rKOFZ+RvpN19P4oKv  
CDTJYsfkZyk99/y4WMFQE4WKWj4frF9fc4vgzz9d+P2V/wiTAHC57ETQrVvNiSAx0Zn3pOJX8qsvk7j  
gK0oHn0b+w09gtWzpdEgNRhOFcozfvsR/PHH7tcsXrvWzbp1VROBzeWy2G8/i65d/TvXGTTr00CSy  
sopo2zZA69aaCFRkeH5bjv/Ag8DtpvD2MZT37EXZgEFOh9XgNFGosPH7YcOG6hPBmjV2i8Dnq75Z  
vu++AY4+elciqNxp3Lq1RVLS7ttnZyeRm+uPwLtSCigpIXCY6Q+NZGCR8ZT8vfLIC0tLpMEaKJQe8H  
vh40bK5aYcFF1Utm6dTUngpYtAxx5ZOAvZaF27apPBEpFC+/Cb8i4+Tq8vy3H36Yt/v3bOx1S2Gmi  
UDUKBHylgspDRyv6Ctatc1FeXn0i2GefAF26BHZelaxqlkhOjvCbUWpvFRSQ9tC9pLz0fwaUX34Vh  
WPuwUrPcDiw8NNE0YgFarBpk2tna6C6RFBWVn0iyM4OcPjhNSeCIJQlvxmlwixp9kxSX3we30Edy

Z8wBV+PY50OKWI0UcSxQAByc2tOBDk5NSeCFi0CdO68eyKoKBG1bh0gNTXCb0YpB7i25YHHg5W  
RSekZZ5NfXEzJWcNobE1iTRQxzLLs0lDlfoFdfQV2ligtrTkRdOpUfSJo00YTgVKJ0z4gY/QtIA4aQsHjE8  
HlouSci50OyxGaKKLcli0uVq+uLhG4yMmBkpL0ap/XvHmAQw75a0dxRSJIS4vwG1EqRrg2biTjjlEKT  
f8AKyKjf9t29lIZHEyc21OaKKLYp596GD48pdr1hpo1C9CpE+y3X/lfLIXZpk2A9Orzh1KqJpZF0ltvkH7  
3Hbi3baO8+7HkT5yC/6COTkfmOE0UUEzNNxOwLBeXXFKGyO6dxunpkJ2dQW5uidNhKhUXPctXk  
HHzCKzkFPIffoKSS6/Qi3sEaaKIUKVF8PHHXjp0CPDoo6WNudWrVPgEARjy8rCaN8d/UEfyJ06h/LjeB  
Nq2czqyqKKJlKp9+qmXoilXQ4aUaZJQKgw8vy0n4+YRYFlsm/oReDyUnneB02FFJW1XRanp0+0cPn  
Soz+Filloz5eWkPvkETU/sScLCBfhbctZVXOR0VFFNWxRRqLgYZs3y0q5dgMMOCzgdjJlxw7t0Cek3X  
kfCsh/x79OSgscmUjZosNNhRT1tUUSHzz7zUljoYujQci07KdVQSkvJHH42Cct+pPiCi8mbv1CTRlJc2q  
IQKQHAJMADvGiMeaTK4+2AV4Gs4DajjTEzwhlTLJg61f61DBmiZSel9pYrfwdWRiYkVHwxCSsIBTK  
+5zodFgxJWwtChHxAE8DA4FDgeEicmiVzcYCbxtjjgTOA54JVzyxorR0V9mpSxctOym1p1wF+TbiBE  
2PO8ZeigMoGzBlk8QeCGfpqRuwwhizyhhTBvwHOK3KNhaQGfy5CfBnGOOJCZ995qGgwMXgwT4  
tOym1hxl+/Zimx/eAp5/GyszEnZvrdEgxLZylp9bA2kq3c4DuVbYZB8wWkeuBNKB/KC+cnR2/y/p+/L  
H9/8UXJ5KdXfdl2uL5WNSXHotdGu2x2LIFRo6Ef/0LvF646y68Y8bQTC9wsIfCmSiqOx+2qtweDrxijB  
kvLscCr4lI2NMrTWX3Nz8hooxqpSWwvvvp9O6tUWHDoXUdRjKz8yOz2NRX3osdmnMxyLz/PNJ  
mjOb8iOOJH/iFJqd2DN4LMqcDs1xe3PyEM7SUw7QttLtNvy1tHQ58DaAMeZrIBloEcaYotq8eR527  
NCyk1L1Uly888fCO++h4K772DbzE/ydD3MwqPgSzkSxCOgolh1EJBG7s3pqlW3WAP0AROQQ7ETR  
aluJU6cmADB0aLnDkSgVAyyL5Ddeo/nRnfD8tAwAf+fDKL7+JrvspBpM2BKFMcYHjABmAb9gj276S  
UTuE5Ghwc1uAa4UKSXAm8Alxpiq5alGoawMZs70st9+AY4+Wkc7KVUb9x+raXLO6WTcdB2UIOJZ  
/bvTlcW1sKbd4JyIGVXuuv7vSzz8Dx4Uzhlgxf76H7dtdnHtuuS5YqVRN/H5SXnqetIfuw1VURGn/kyl4  
/EkCrds4HvLc0/ZZIKiYZDd4sE6yU6omqZMnkPbw/QSaNSP/iUmUnjWsUV9QKFI0UUSB8nKYOTOB  
li0DdOvmdzocpaKLzwcE7hcFF96Be516yi8fQxWdrbTkTUaWuSIAvPne8jLs0c7adljQv28P3xH0/7  
Hk/T+fwGwsppS8MSTmiQiTL+WooAuKa5UFcXfPn17F1kD+uL9eRneZUudjqhR09KTW3w+mDHD  
S3a2lp2Uakj4aj7pN4/A+/sq/Pu3J3/CU5T37uN0WI2ajgqHffWVhy1b3Fx6aRkej9PRKOWshHmfk3  
XWECy3m6JrRIA4eiykpbjodVqOnicJhuqS4UkAgAG435T17UTz8QkouvhTf0cc4HZUK0kThIL/flju1aB  
Hg2GO17KQaH9eWLaSPvZ1A6zYUjh0HHg8Fkxr91QaijnZmO+jrrz1s3uxm0CCflp1U42JZJP3vXzr1  
6kryf98m4av5doedikqaKBw0bZqOdIKNj3v9n2T+fTiZV1+Gq6ilgnsfYtu0Wbo+UxQL6TcjlunAAcaY  
H8McT6Ph99vDYps3D9Czp5adVOPg2ryZpsf3wL19G2W9jid//GQCHQ5wOixVhzoTRfC61y8AfqC9i  
BwD3GWMGVr7M1VtFi70kJvr5qKLyvRESsU/ywKXC6tFC0ouuBj/gQdRcuHfdfmNGBFK6ek+7CvT5  
QEYYxYBB4YzqMZARzupRsHvJ+XZKWRredpGdLIDCcQ9QctElmiRiSEh9FMaYqhcc0stF7YVAwC47N  
W1qcdxxWnZS8cnzy89kndqf9HvuJGHBl7hz1tb9JBWVQkUhSKSTfAypilSG9ge1qji3MKFHjZudD  
NoUDkJCU5Ho1QDKysj9fGHadq/NwnfLabkzHPYOv9bAm3bORZ22kOhVMfvxL74UAcRmQMCCp  
wW1qjiXMXaTlp2UnHHssg641QSFn2Df79WFDw+kbKTbzodldpLdSYKY8zXItIP6AW4gC+NMVvCHI  
mcCgTsYbFZWRa9e2vZScUZl4uSYcPxHdKJwrvvxcps4nREqgGEMuppvDHmFmBaNfepelq82M369  
W7000/LTio+JMz/gtQnx7P91TcgLY2Sv1/mdEiqgYXSR3FiNff1behAGoupU+3sMHRoucORKLV3X  
Du2k37LDWSdOZiE+Z+TOP8Lp0NSYVJji0JEzgL0BvYXkTcqPdQEKA53YPGoYrRTZqbF8cdr2UnFrsR  
ZM0m/9SY8G9bjO6QT+ZOextfIKKfDUmFSW+lpFfAJ0DP4f4UdwMfhDCpeff+9m3Xr3AwbV5iotP  
RKLvN0h68l9RJ47ESEii8fQxF19+MfqDjW42JwhjzPfc9iHxgjMmNYExxq6LsNGSIlp1U7CrtfwoJX80  
nf/xk/H87xOlwVASEMjx2q4hcBnQBkivuNMZcFbao4pBl2WWn9HSLE07QspOKHe510aTffScFd91  
LoH0HfN17sG36bJ1Z3YiE0pn9HHbn9RnAWuxhsvpNV08//OBm7Vo3p5zilynJ6WiUCkEgQPrlr9G0  
d3eSpr1Pyyuv7npMk0SjEkqi6AFcBOQZY+4HjgPahzOoeKRLiqtY4lm1giZnnErGbTeD203+k09TOO  
Yep8NSDgklURQbYyzAlYlpxpg8oHWY44orlmX3T6SIWZxwgiYKfd0SZ35I0xN6kvj1I5QOHEze/IWU  
nH+RtilasVD7KJoAs4HplrlZ0M7teli61M2aNW7OPlOclBSno1Gqdr6jjsbfp2Fo8dSNuR0TRAqpEQx  
FCjHXvPpliALeCWMMcWdiiXFBw/W1oSKQqWlpE58nPU3SnvexKBlvuSN38RuPUCmMoWylpPFU

uK+wkmCBEZCMwMX1jxw7Jg2rQEUMt+vXTRKGii/fbhWTcPAKv+ZXY7seyre9J9gOaJFQltSYKETk  
DaAfMMMb8JiL9gQeBpmiiCMmyZW5+/93Naadp2UIFkcJC0h65n5T/exaXZVF82ZUUjh3ndFQqSt  
W2hMdE7OXEvwOuFpH/Af8AxAghPRiS6OFCxpLiOdILRwr1qJvNdZsCzZjW+Aw+iYOIUynv0dDosFc  
Vqa1EMBI4wxuSLyL7AaqCLMebXiEQWBypGO6WkWPTtq4ICRYdAm7YEMjMpvWEkhaNGQ3Jy3  
U9SjVptiaLIGJMPYIzZICLLNUnUzy+/uFm50s2QleWkpTkdjWrMEmdMx71xAyWXXgGJiWybNRdd5  
16FqrZE0UJEKi/TOaTybWPM/4UvrPhQMdpJy07KKa5Nm0i/81aSp/6PQEYmpWcPw8r11CSH6qW2  
RPE50LvS7S8q3baAOhOFiAwAJgEe4EVjzCPVbDMMu9/DAPYYY84PKfIYMH26l+RkHe2kHGBZJL3z  
H9LvGo07L4/yrt3lf/JpO0koVU+1rR570d68slh4gKeBk4AcYJGITDXG/Fxpm47AHcBxxpg8Edlnb/YZ  
TX791c3y5R5OPbWc9HSno1GNSkkJmeefTdnH2OlppH/0GOUXHoleDxOR6ZiVCgT7vZUN2CFMW  
YVglj8B3sU1c+vtrkSeDq4LAjGmE1hjCeikTz2GjJEWxMqwpKTsTlyKOtzlvnjJxNot7/TEakYF85E0Rp  
7tdkKOUd3KtscDCAiX2KXp8YZy6q64WzszMaKsawmTEDkplg/PNTyAhjuLFwLCKIUR8LY+Ddd2H  
MGACS//0apKTQXJffaNyfiwYSzkRR3SfUqmb/HYETgDbAPBHpbLzZVtsL5+bmN0iA4bJ8uZuffkpwI  
BySkpKKCKjz36yszOi/lhESqM9FuXlpDz7FGmPP4yrtJS8o3rQdGA/cgv9UFjgdHSOa7Sfi2rsTclMeZ6  
+iDSt52vnAG0r3W4D/FnNNh8Yy8qNMb8DBjtxDRdUlxFgnfpErIG9CX9gXFYmU3Y/tJr+Lp2czosFY  
fqTBQi0lVEfgd+rHQ7lJnZi4COltJBRBKB84CpVbZ5Hzgx+LotsEtRq+oRf1SaOtVLYqLFySdrolDhkfrEI2  
SdfAIJS5dQct4FbJ2/kLIhpzkdlopTobQonsReQXYzgDHmW+D4up5kjPEBI4BZwC/A28aYn0TkPhEZ  
GtxsFrBFRH4G5gK3GmO21P9tRI8VK1z88ouHEO/0k6kjEVWYwImJBFq1Zttb/yN/8rNYTZs5HZKKY  
6H0USQZY5aKSOX7ymrauDJzAxAgrpX77q70swWMDP6LC9Om2ROZBg8udzgSFVcKckh94VmKrrs  
REhMp/sf1FF92FTTr2WkVCKImiTERSCXZEi8jfCDFRNEbTpnIJSLAYMEDLTqphJMz9hIxRN+JZuwaG  
W8ceAAAgaEIEQVQRly3iq661Z1br7GoVlaEkioeAj4FWlvlicCpwSTiDilWrVrlytsxD//4+mjRxOhoV6  
1x5W0m/ZwzJ//k3lsdD4c2jKL74MqfDUo1QKBcu+IBElgMDsle8PmaMWR72yGLQ9On2Gd7QoVp  
2Unsn8ZPZZNxxwLe7cTZQf3oX8iVPwH3a402GpRqrORCEiw4H3jDFPRSCemDZ1qhev1+KUU7TspP  
aeK38HBWPvpfja68EbzilPstUulFFP5wJrRORZEak6s1oFrV7t4scfPRx/vJ+m9Z1xopRlKfSff+PesB6As  
n4ns2XRuOpvuFmThHJcnYnCGHM60Al7MtxzlvKziNwa9shiTMVoJ13bSdWXe80fNBI2Opk3/IO0c  
WN33m+1bOlGVertEtLMbGPMZmPMk9i4+YBf1kuvLgBpt2Lx2MxcKD2T6gQBQlkv/gczY7vQeLn  
cynr25/CMfc4HZVsfXFKH4ULOAW4FDtRfAj0DXNcMwxNGhfff++hTx8fzXTekwqBe9VKMq+/hoR  
F3xBo2pT8xyZQes55olv4qSgUSvEzB1gOvApcZowpDG9IsWf6dF3bSdWTy4V32Y+UDD2Dgocex9o  
nbi7FouJQKlniOGPM6nAHEsumTUvA47EYNEgThaqZ98cfIBDA1+UoAh00YOvncwi07+B0WErVqc  
ZEISI9jDELgINF5OCqjxtjZoc1shiRk+Ni8WIPvXv7aN686irqSgHFxaQ98Qgpz0zGf8CB5H2+ALxeTRlq  
ZtTWorgKWADcVc1jFqCJAi07qdolLPiK9JtH4F25An+/7SI46HEd7qpiTm3XzL4s+H/vyIUTE6ZNS8Dt  
1rKTqqKggPT77ybl5RexXC6Krr6WwtF3QVqa05EpVW+hXl/i81Dua4z+/NPFokUeevb0k52tZsdVict  
F4qdz8B0sbJs+m8L7H9EkoWJWKG3g3a6fJyJulDs84cSWDz+0D9/gwdqaUODaugXvsqWUH38CpK  
Wx/a338Ldua188XakYVltn9i3AKKCZiFS+hGka8G64A4sFU6d6cbksTj1VE0WjZlkkTf0f6XeMgpJS8r  
5cRGC/VvgPOMjpyJRqELW1KP4JfABMAa6rdP8OY0xuWKOKARs2uFi40EOPHn5attSyU2PI3rCe9N  
tGkvTRh1jJyRTEpPzAts6JUPGlts7sPCape3lxVcWHH3qxLJeOdmqsLlvkN14j7Z4xuHdsp6xnL/InPEX  
ggAOdjkyPBlDb6ekVY8wllvl1wavbVWaM6RnWyKKclp1UOrT3IRAg//EnKbnoEnChTHSaUjGnttLTM  
8H/x9ayTa00caOLBQs8dOvmZ999tezUaPj9JHw5z+6sdrnIn/AUWbaB1m2cjkyPsKqt9LQw+P8nFf  
eJiBfIMsZsjkBsUaui7KRLijceHvMrGTddR8LiRwz734eUH9ebQkvWtoelVESEMo/idRFpIilpwDJgpYj  
cFP7QolFfbGwdFtsilJWROv5RmvbrRcLiRZSceTY+OcTppqJSKqFCKqp2NMduBQCAXQCug0V7hPTfX  
xVdfeeja1U+rVlp2imfeH76j6cknkPbogwSat2D7a2+R/9w/sVq0cDo0pSlqIERRUZ46HvgwuMx4IH  
whRbcZM7wEai6GDtULFMW7pOIT8f68jOKLLiVv3jeUnTLQ6ZCUckQoM7ONiMzEvhzqncESVKM1  
daqWneKZ97tv8R1xJHg8FN5yO2X9T6a8R6Me4KdUSC2Ki4CXgL7B1kRzYExYo4pSmzfbZaejj/bTpo  
2WneKJK38H6bfeTNMBfUI56Xn7zpQUTRjKEUKiMMYUAZ8AB4rlyUChMebDsEcWhWbO9OL3ux  
g8WMtO8STx449o2rs7Ka++hO9vh1B+9DFOh6RUVAlI1FN/wAC3A3cAv4plo7xm9rRpdtIh8XGB9

eWLWT84wqaXDAMd+4mCkeNjM/OPHYaKJTaTSh9FA9jI52WAYhIJ+zrZ3cNZ2DRZutWmDfPw5F  
H+mnXTstO8SDhy9I/u/blB95FPkTn8Z/aCenQ1lqKoXSR5FYkSQAjDE/EVqCiSsffVRRdtLWRCxZR/8  
TV95WAMqGnM72f77OthmfAJJQqhahJIrNlnJhxQ0RuQDYEr6QotPUqQkADBmi/RMxybJlfu0Vmv  
bqRvo9wbEYLhdlg4eCx+NsbEpFuVBaBv8A3hCR57EXB/wFGB7WqKLMtm3wxRceDj/cT/v2WnaK  
Ne5VK8kYdSOJ878gkJFJ+THdnQ5JqZhsZ6lwxihHuoplvD2trBHFwU++siLz6dLisccv5+U558h7dE  
HcBUXU3rKQAoem0hgv1ZOR6ZUTklmfE2wBOAAN8BtxlJGI3JCWDaNLvspMNIY4tn1UrSHrgHKy  
uL/EnPUHrameByOR2WUjGntj6KF4CNwN3B7Z6ISERRZvt2+OwzD507+zngAC07Rb2yMtZR7Sv3+j  
sezI7/e4Wt8xZRevPzmiSU2kO1Iz7aGGMGAojIDGBRFV9cRAYAkWAP8Klx5pEatjsbeAc4xhjzbx33E  
04ffeSlvFyXFIF8F3u++JeOm67CSktk28xPweu3OaqUXqmtRbGzzmKM8df3hUXEAzwNDAQOBYaL  
yKHVbJcB3AB8U999RML06XbZSRcBjGKFhXDLLWQN6o/311/wHXkUIJU5HZVSCaO2FsXBIVJVTbdD  
uBRqN2CFMwYVglj8Bzgn+LnKdvcDjwGjQo46QnbsgLLzPRxyiJ8DD9SyUzRkMpc5GSOvhz9W4+9w  
AAUTp1Des5fTYSkVv2pLfkft5Wu3BtZWup0D7DYuUUSOBNNoaY6aLSMIJljs7Yy9DC83s2faJ6fDhn  
oJts76iNa6IKCmBEVfBxo1w2214x40jK6VRL268U6P+XFShx2Lv1XYp1E9qeixE1fUc7jwTfXfE3MBG4  
pL4vnJubv+dR1cPrRYcDcFtW0hubvRdgiM7OyNixyKauDZuxGrZEoCEyc9hNWIC05P62MeioPEdj6  
oa6+eiOnosdtmbhBnkzOw9lQO0rXS7DfBnpdsZQGfgMxZFDFQApopIVKwhVVAAC+d6+dvf/Bx8cP  
QlicltXkzGVdfSrMTeuDabF+2vzbPifi6HOVwZerFt3Cu2bQl6CgiHYB1wHnA+RUPBi+vuvOakiLyGT  
AqWky9zZ7tpbRU13aKcPzF0n/fJn3s7bi3bqX86GNwFeTrJUmvipCwtSiMMT5gBDALe9mPt40xP4  
nlfSIS9WMWK5YU19nYznKvyyHzwmFkXnslrplSCh54hG3TZxNo38Hp0JRqNFyWVfdoHhHpAxxijHI  
ORPYBMowxK8MeXfWscNccCwrgOEPtads2wPz5RVE7T6sx1F+bnHcmiZ/Ooez4E8kfp4nA/u2r3a4  
xHltQ6bHYRY/FLtnZGXv8TVZn6Sk4GukMYB/gOSAzeAXovac7jXaffOKlpMSeZBetSSKeubZvw2qSB  
UDB/Y+QMPQbSoZfqDORlXJlqNfMPgEoADDGrAGywhi46Z01SvZOcLnI2XKJp1ORTvD98B9jlcJed  
fpElCKQeFkiiKjTFVpyXH7TCgwkK7RXHggQEOPTRu32bU8SxbStbAfqTfdxekpODautXpkJRSQaGMe  
soRkR6AJSlu7Gtn/xLesJzz6adeiopcDB1apiexkVBaSurEx0idPBGXz0fJsOEu3PcQvRpmTkemlAoKJV  
HcALyOPeehCFiAPdQ1LIWMDtJhsZGRONkCaRMex9+6DQVPPElZv5OdDkkpVUuoFy76E+gbXLzPH  
Zz/EJeKi+35Ex06BOjcWctOYVNUBCkP4HJRfM11uMrKKLpxJFa6LrWgVDQKZdTTyVVuA2CMmR2  
mmBxTUXYaMkTLtUGS8NmnZly6kcJRoyk97wKsjEwKx9zjdFhKqVqEUnq6q9LPycBhwA9A3CUKn  
WQXPq5teaSNG0vKG69heTy4N25wOiSIVhCKT3tNI9CRA4Drg9bRA4pKYFzS7y0axfgsMO07NSQE  
j+cRvrtI/Fs2kh558MpeHIKvsO7OB2WUipE9V7CwxizFDgiDLE4au5cL4WFLoyOLdeyUwNK+HQOTS  
69APf2bRSMuYdts+ZqklAqxtS3j8INHBPk82JNRdlJJ9k1AMsCnw8SEig/os9FV19HycWX4u94sNOR  
KaX2QH37KHzASmBYeMJxRmmpXXZq2zZaly5adtob7py1Zly6EV/Hgym8/xFwuym8/2Gnw1JK7YV  
aEOXw4kIPGmM+ilA8jvsMw/5+S4uvFDLTnssECD55RdJe2Ac7sICLJcL/H7weJyOTcm1I2rtozDGBIC  
7lxSLY6ZNSwBg6NCqK5WoUHhW/EbWaQPJuGMUJHjZMflZdrzxriYJpeJEKJ3Z34ni0WGPxCGlpfD  
RR15atw5w1FFadqov16ZNN03fm4RvvqZ0yOlsnbel0vMu0EX8llojofRR9ACuFpFfCK4gC2CM6Rm  
2qCJo3jwPO3a4GD5cy071EgiA2421zz4UXX8zPjmEssFRfz0qpdQeCCVR3B72KBw0dapddhoyRMt  
OISkpiXXCYyR8v5jtb78PLhdFt8T1R0SpRq/GRCEilXlJlJfGfBlJgCKprAxmzvSy334BunbVslNdvN8sIO  
Pm6/Cu+A1/23a4/1xHoHUBp8NSSoVZbXOUR0YsCofMn+9h+3YXgwf7clft6uFxoKCAtdtvJWvoKXh  
WrqDoymvY+vkCTRJKNRJxN3GuPnSSXQgsi6zTBpKwdAm+jgeTP2EKvu49nI5KKRVBtSWKw0RkUz  
X3uwDLGLNpmGKKiPjymDEjgZYtA3Tr5nc6nOhjWfbIJZeL4quvpWzlbxTdfBskJzsdmVlqwmpLFMu  
BQZEKJNK+/NJDxp6Lyy8v17JTFYnTPiD1qQls/+80rlxMSocNdzokpZSDaksUpcaYPyIWSYRp2emv3  
Bs3kD56FEkftSVKSsL77SLKT+zndFhKKYfVdi5dFrEolszngxkzvGRnB+jeXctOWBZJb750017dSPpwK  
mU9epI39ytNEkopoJZEYYyJ2x7Lr77ysGWLm8GDfbrKBJA25jYyb7wWfd7yHxnP9vnd4D+oo9NhK  
aWiRkMc9aRlp92VnnMenjV/UPDIEAJt2jodjllqyjs6bly/Hz780EuLFgGOPbZxlp08yw1NzhyM57fIA  
PiOPJodr7+tSUIpVa1GlygWLPCwebObQYMaYdmpvJzUiY/TtO9xJM7/gqSp/3M6lqVUDGh0paepU  
+23PHRo4yo7eZd8T8aN1+H9eRn+lvtS8OgEygYNdjospVQMaFSJoqLs1Lx5gJ49G0/ZKen9/5Lxjytw

+f0UX3AxheMewGqS5XRYsqkY0agSxcKFHjZtcnPRRWV4G9E7L+vVB98RXXSi88x7Kjz/B6XCUUjGm  
UfVRVJSdBg+O77KTqyCf9NtHkjhjOgBWixZsm/mpJgml1B5pNOFvgQBMn+6laVOLXr3it+yU+MIs0  
kfdhGddDp6VK3f1Q+hVmZRSe6jRtCgWLVSwcaObgQPLSUhwOpqG59q6hYzrrqLJ8LNxb9xA4S23s  
/3fbzsdlllqDoS1RSEiA4BJgAd40RjzSJXHRwJXAD4gF7gsXOtLTZ8ev6OdPMsNWacPwr05l/luR5l/8  
Wn8nTo7HZZSKk6ErUUh7gaWAgcCgwXEQOrLZ90BXY8zhwLvAY+GIJRCwZ2M3aRkFzSf/AQfiP  
/AgCu55gG0zPtEkoZRqUOFsUXQDVhjhVgGlyH+A04CfKzYwxsyttP0C4MJwBLJ4sZv1692cd145iYn  
h2EOEWRbJb7wGvmL4+9Xg9bLtg5noeulKqXAIz6JoDaytdDsH6F7L9pcDM0N54ezsjHoFMmeO/f+  
FFyaQnR3jHRsVsFVv8Enn0Dz5mRffTVk1O94xKv6fi7imR6LXfRY7L1wJorqhtlY1W0olhcCXYE+obx  
wbm5+yEFYFrz9dhqZmS6OOKKA3NyQnxpd/H5SXnyOtlfvx1VUROlJp5D0zxfJLQFKQj8e8So7O6Ne  
n4t4psdiFz0Wu+xNwgxnosgBKq8y1wb4s+pGltfGAP0McaUNnQQ333nZt06N+ecU05SUkO/eoQ  
UF5N15mASFi8i0KwZ+eMnU3rmOWTvkwn6R6CUCrNwJopFQEcR6QCsa84Dzq+8gYgcCTwPDDD  
GVHd97r02bZpdaho6tDwclx8ZKSn4D+qlv107Ch58HkTFC6cjUko1ImHr/TTG+IARwCzgf+BtY8xPln  
KfiAwNbvY4kA68lyl/iMjUhozBsuzRTunpFn36xNZoJ+/3i0m79y77TQD5E54i//mXNUkopSlurPMoj  
DEzgBIV7ru70s/9w7n/JUvcrF3r5qyzyklODueeGIBREWmPPUTKc1NwBQKUnnYGvi5HEZezBJVMSMS  
Gux1PG2pLiCV/Oo+mJPUl9ZjKBdvuz7b3pdpJQSikHxe1aT3bZKYG0NIsTtoJ+RJF2952kPjcFy+2m6  
NobKLztTkhNdTospZSK30SxdKmbP/5wc+aZ5aSkOB1N3QKtW+M75FDyJ07Bd1RXp8NRSqmd4rb  
0NG1adC8p7tq8mbR7xkBJCQDFV1xD3sdfaJJQSkWduEwUlgVTpyaQmmrRr1+UJQrLlum9d2jW+x  
hSn32K5Ndfse/3eliP9UWUUVEmLhPFTz+5+f13Nyed5luqspP7z3VkXnQumddcjquoilL7HqLk0iudD  
ksppWoVl30UFWWnaBrtIPTBe6SPvAF3/g7Kevchf/xkAu07OB2WUkrVKe4SRUXZKSXFom/f6EkUg  
eYtwO0mf8JTIFxwsV5xTikVM+Ku9PTLL25WrnTTv7+PtDQHA/H7SXluCu4cewHd8l7Hs/W7ZZRc+  
HdNEkqpmBJ3LYqKSXZDhjjXmvD88jMZN11Lwvff4f3he/KfewkAKyPTsZiUUmPpxV2imD7dS3KyRf  
/+DiSKsjSn3yC1EnjzWXU3L2uRQ88Ejdz1NKqSgWV4ni11/dLF/uYdCgctLTl7tvzy8/k3n1pxh//QV  
/q9YUPPEkZf1PiWwQSikVBnHVR+HkaCcrIwP3unUUX3I5efO+0SShllobcdWimDbNS1KSxcknRyZR  
JMz7HCshEV+PYwm0acvWb37QZcCVUnEnbloUy5e7+fVXDyee6At72cm1fRvpl68n66whZNX8Hfjt  
a11oklBKxaO4aVFUIJ3CPdopceaHpN92M56NG/Ad0on8SU/by28opVSciqtEKzhoccp4UkUru3bS  
L/1JpLffw8rMZHC0WMpGnGTrs+klIp7cZEoVq508fPPHk4+2UdmmKYqWEnJeJf+SPnRx5D/5NP45  
W/h2ZFSSkWZuEgU06bzIwkdMqS8QV/XvS4H79IfKRswCJKT2f7faQRa7qulJqVUoxIXndITp3pJSLA  
YMKCBYk6BAMkv0jTtXt3lvOYy3H+us+9u1VqThFKq0Yn5RLFqlytlyzz06eOnSZO9fz3Pty9ocvogM  
m4fCV4v+Q8/QWC/Vnv/wkopx3z++Vx69erKH3+s3nnfd999y2233bTbdg8+OI65c+cA4PP5ePbZpz  
jvDO46KJhXhnlxXz99Zd7Hctrr73MueeezvDhZ/LNN19Xu8233y7kssu4JLLzucf/7icnOCace+//y4X  
X3zuzvt//33VXscTipgvPU2fbpedhg7dy7JTIEDK05NJe/whXCUIIA4aQsGj4+1Sk1lqps2ZM4vDD+/C  
nDmzuPzyq0N6zgsVPMuWLZv517/eljExka1bt/D999/tVRy//76KOXNm89prb7N5cy433XQtb775H  
p4qlyonniErX4ZT/v2HXjvvXd49dWXGDNmHCedNIDTTz8bgPnzP+eppyYyYcJTexVTKGI+UUyb5s  
XrbYDRTi4XCYu+wUrPYMfT/OfZ4NN0IVelGtC4cUk7h7E3ICFDflwbV1rrNkVFRSxduoTJk59j9OIRIS  
WKKplSpk17n3fe+YDE4MjGzS2a06/fSxSv7/z5n9O//8kkJibSqlVr2Rrppy+//ETnzofvtp3LBYWFhQA  
UFhbQokU2AGlpuyaJFRcX44rQd1RMJ4rVq10sWeKhb18fTZvuwQuUlpl4+yPKhthJIX/8ZPC4sZo1b  
/BYIVLOmDfm7p3P5Z27fYnM7MJxvyK1DFqMSdnLS1bttzti7kmkyeP57vvFv/l/n79Tuaiiy7Z7b7c3  
E106nTYztvZ2fuQm7vpL88dPfoubr31RpKSkkhLS+P551/e+dh///s2b731b3w+H5MmPVtnfA0hph  
PF9OI7PsnOu+gbMm4egXe5Ydvb71N+Ql+s7OyGDIEpFTRuXGmdZ//hMGfOLiYNGw7YX95z5sxCS  
G81no3X9yz9hhtuCXlbywptf2+99QaPPz6JTp0688Yb/+KppyYyevRdAJx11jDOOmsYs2d/xKuvvsTY  
sffWK949EdOJYtq0BDwei4ED69E/UVBA2iP3k/LCc7gsi+LLr8LX9ZjwBamUckxeXh6LF3/LqIUrcblcB  
AIBAK699gaaNGlCfv6O3bbfsWM7TZpk0aZNWzZu3EhRUSGpqbVfAa0+LYp99tmHTZs27rydm7tp  
Z1mpcswrViynU6foAPTtezKjRI3/l9fv3/9kxo9/uNbYgkrMJJoq1a118/72HPn18NGsW2nMSPp9Lxi0  
34FnzB76DOpl/YQq+HseGN1ClIGNmzZrFgAGDuO22MTvvGzHiKn788QcOOaQTmzdVzVxQ32nfvg



MbNqxnYr6NhRSE5OZvDgoTz55BPceudJCQksHnzZhYvXsgppwzabR/1aVEcd9x3HvvWM499  
wl2b85l7dq1HHJlp922ycjloLCwgdVr/qBdu/359tsF7L9/ewDWrl1D27btAPjqj/m0adNuD49M/cRs  
otiTJcUTFi7AvS6HohtvofCW2yE5OVzhKaWiwlcfssiwYRfudl+fPn35+OOPOOKII7nrrvt46KF7KSsrw  
+v1Mnr0WnkDq4peeeW1vPDCM1x44TkkJiaSnJzCFVdcs1fxHHDAGfTt258LLzwhJ8fDyJG37RzxNG  
rUDYwefRctWmRz221jGTv2NlwuNxxkZGdxxx92A3T/x7bcL8Xq9ZGRkMGbMuL2KJ1Quq7qiWXSzc  
nPzGTgwIR9+cLN0aSEtWtT8HhLmfKJ57z7g9UJZGZ7fluMPNuliXXZ2Brm5+U6HERX0WOyix2IXPRa  
7ZGdn7PEQqZicccJeT42LxYg89e/prTBKuTZvluOLvZJ17BinPBMcZJybGTZJQslllicnSU62jnSyLpLffJP  
2u0bi3baP8mO6UDTw1whEqvVT8iMlEMW1aAm63xaBBuyck99o1Zly6kcS5n2ClppH/8OOUXHol  
uGOy4aSUIEH5hJFTg4sWuThuON87LPP7mUn79IfSz7CWUn9iP/iUkE2kZmRIBSSsWzmEsU771  
n/19RdvKs+11AVIOsFi0oGzSYbe9Np/y43rr8hJKNZCYq8m88w64XBannlxMyqTxND2xJ+ljb9v5eH  
mv4zVJKKVUAwpri0JEBgCTAA/wojHmkSqPJwH/Ao4GtgDnGmNW1/aaX34JFx/2Lfl3K0IYuoRA9j6  
UDj49PG9AKaVU+FoUlulBngYGAocCw0Xk0CqbXQ7kGWMOAiYcJ9b1ug9Yd/LPZceSsHQJxcMvZO  
uXiygbPLShw1dKKRUUztJTN2CFMWaVMaYM+A9wWpVtTgNeDf78LtBPRGqtG41kAr59W7Ptrf9R  
MOkZrKw9WTZWKaVUqMJZemoNrK10OwfoXtM2xhifiGwHmgOba3rRZKvEBZDYokHGrudzDKdDi  
Bp6LHbRY7GLHou9F84WRXUtg6rTqEPZRimlIIPcmShygLaVbrCB/qxpGxHxAk2ArWGMSSmlVD2Fs  
/SOCOgolh2AdcB5wPIVtpkK/B34Gjgb+NQYoy0KpZSKImFrURhjfMAIYBbwC/C2MeYnEblPRCqGKb  
0ENBeRfCBiYHS44IFKkbVnYnGZcaWUUhEUczOzlVJKRZYmCqWUUrWK2kUBw7H8R6wK4ViMBK4  
AfEAucJkx5o+IBxobDR2LstudDbwDHGOM+TaCIUZMKMdCRIYB47ChnS8xxlQdUBIXQvgbaYc9uTc  
ruM1oY8yMiAcaZiLyT2AwsMkY85ertAUnNE8CBgFFwCXGmO/qet2obFGEa/mPWBTisfge6GqMO  
Rx7hvtjky0yMki8FohIBnAD8E1kl4ycUI6FiHQE7gCOM8Z0Am6KeKAREOLnYiz2gJojsUdgPhPZKCP  
mFWBALY8PBDog/10FPBvKi0ZloiBMy3/EqDqPhTFmrjGmKHhzaFacI XgUyucC4H7sZFkSyeAiLJRjCS  
XwtDEmD8AYsynCMUZKKMfCAjKDPzfr3O64olx5gtqn4t2GvAvY4xljFkAZInlfnW9brQmiuqW/2h  
d0zbBobgVy3/Em1CORWwXAzPDGpFz6jwWInlk0NYMz2SgTkgIM/FwcDBlvKliCwllmfiUSjHYhx  
woYjkADOA6yMTWtSp7/cJEL2JQpf/2CXk9ykiFwJdgcFDGpFzaj0WluLGLkPeErGInBPK58KLXWI4A  
RgOvCgiWWGOywmhHlvhwCvGmDbY9fnXgp+XxmaPvjej9UDp8h+7hHIsEJH+wBhgqDGmNEKxR  
VpdxylD6Ax8JiKrgR7AVBHpGqkAlyjUv5EPjDhIxpjFAYOdOOJNKMficuBtAGPM10Ay0ClioUWXkL5  
PqorWUU+6/McudR6LYlnleWBAHNehoY5jYYzZTqU/fhH5DBgVp6OeQvkbeZ/gmbSltMAuRa2KaJ  
SREcqxWAP0wz4Wh2AnityIRhkdpgljROQ/2Kt5bzfGrK/rSVHZotDIP3YJ8Vg8DqQD74jldyly1aFww  
yrEY9EohHgsZgFbRORnYC5wqzFmizMRh0+lx+IW4EoRWQK8i0sNO5OLEXktcuggFEAAAUBSURB  
VOyTZxGRHBG5XESuEZFrgpvMwD5ZWAG8AFwbyuvqEh5KKaVqFZUtCqWUUtFDE4VSSqlaaaJQSi  
lVK00USimlaqWJQimlVK2idR6FaiSCE+NK2LUu01xjzM11PCcH6G+M+bUB9v8A9ppl64EkYD5wrTG  
mfA9e6zrAY4yZLCJHAQcYY94NPuYBFgPdgusR7bXgcccHyoAE4HFjzMshPO9MYE2czi9RYaCJQkW  
Ds40xyxzc/8vGmNEikgx8gZ046r26qDhM6Uo3jwL6Yy9YiTHGD3RpgFirOsMY86ulHAESepEZxpiNd  
TznTOyEqllChUQThYpKlnIR9iSqROy1aEYaYz6rZrv7gGFAKeAH+hhj8kXkWOBh7ImIAHcZY2pdLNE  
YUyli8wEJvwapwAPY1y/YCFxtjFkVnNn7MpDCrusrPBlSnXiBCcDdQlAl/EBwshtQHnzOcgCQMeac4  
H4SsBdqOwZ7iYU7gNOxWwlrgCvrnmFvjFkiIvIAK2CjiHQBpgCp2C2I54wxT4nIIoy1jvoEJ2E9boz5t4  
hcBlwTjD8PuMY81tt+1SNh/ZRqGjwbnBG+Q8ickrwhnGmO7B6wdciH2Rqt2ISDZwI9DFGHME0  
AcoFpFm2C2Cc40xXbGXVn5BRDKrvkaV18sCTgK+F5F9+f/27iVExziK4/h3XMplgVDChuJX5JJbLhOa  
LMXSWGBsbFiwkVKuibBQSpLrCA1JNNRETEQRkt2xYKGGkCURYSzOefUY7zzzzm5qzmc17zP/3v/zf  
xfPv3P+T+d4GfvVhT4f52PoJryG0oxoDnOu+D3xUN8DtJnZzCqptCtAg6QR8Xk58NLM3uJlacYD82P  
td6ihyKOKJXjNnkpK9hpoMLNZeM2rTZImR7OeW8C+uLcLkpbig1N9jD8CnOxuztR3ZESReoNqqadJ  
UY5gLN65b5ykUWb2sTDmE/5APC+pDWiNaKlemAC0SaqM7QAmAi+qzL8+SnB3ANfwTWkI8LRw  
DnlKOCppCJ6e2i9pMB4ttPdksWb2RVlrHlkcA5rwCAVgBZ6ieh73PgDv4NiVa3H+MREvCFk5WxkK  
HJc0DfgNjAGmA6+qfMcKPFx2JOaswwsspgTKRpf6rxZgo5m1xoPwG1717S8z+yIpLIAPNOCRwDL8



QffczBpqnOuMmf1TKyyaYFWtb2NmLZle4tHHdjwKaKp5Ze4scEDSFWAhsCqu1wG7zOy/CKoLITO  
K1cBFSZPM7ANwAE9brTGzX5Lu0un3K6gDTpjZnh6ulfURmXpKvdUw4E38vQHP1/8jUkmjzKzdzHb  
gBeGmAg+BKZIWf8bO6+H8j4A5kibH5/XAEzP7Gi1G38UbRnvxDmudfY41dKUdGA3sA66aWeWtr  
xvAxkrfCEmDJE3v7mbN7Ble3WyNS8OBt7FJzAAWldzbDWCDpLExZ39Js7ubM/UdGVGk3moz0Bq  
vgN7DOxh2NgK4HOMgOvwtnutm9l3SSuBgPHAH4imq5bVObmbvJTUBLdHg5gOwNv7dCDRK+oF  
HHdV6Ud8GtKs10rv4YXbx+zskNQm7gQWF62ckjQTRxqoH3AUeFnDbW8DHks6hJ+RNEtah1cKf  
VAY1wycltQIHl5zit3AzVjrQDyie1bDnKkPyOqxKaWUSmXqKaWUUqncKFJKKZXKjSKlIFKp3ChSSimV  
yo0ipZRSqdwoUkoplqcNIqWUUqk/Jx0d3Dg1QXoAAAAASUVORK5CYII=\n",

```
"text/plain": [  
  "<matplotlib.figure.Figure at 0x7f65cc3c1160>"  
]  
},  
"metadata": {},  
"output_type": "display_data"  
}  
],  
"source": [  
  "\n",  
  "data = requests.execute(output_options=bq.QueryOutput.dataframe()).result()\n",  
  "from sklearn.utils import shuffle\n",  
  "data = shuffle(data)\n",  
  "\n",  
  "from sklearn.preprocessing import StandardScaler\n",  
  "train_size = int(len(data) * .8)\n",  
  "\n",  
  "train_icdmed = data['diag_med'][:train_size]\n",  
  "train_label = data['label'][:train_size]\n",  
  "\n",  
  "test_icdmed = data['diag_med'][train_size:]\n",  
  "test_label = data['label'][train_size:]\n",  
  "\n",  
  "vocab_size = 800\n",  
  "tokenize = kr.preprocessing.text.Tokenizer(num_words=vocab_size,\n",  
  "      filters='!\"#$%&()*+,-./:;<=>?@[\\|\\|\\|^_`{|}~\\t\\n',\n",  
  "      lower=True,\n",  
  "      split=' ', char_level=False)\n",  
  "tokenize.fit_on_texts(train_icdmed)\n",  
  "x_train = tokenize.texts_to_matrix(train_icdmed)\n",  
  "x_test = tokenize.texts_to_matrix(test_icdmed)\n",  
  "\n",  
  "train_sex = data['sex'][:train_size]\n",  
  "test_sex = data['sex'][train_size:]\n",  
  "vocab_size = 2\n",  
  "tokenize = kr.preprocessing.text.Tokenizer(num_words=vocab_size,\n",
```

```

"                filters='!\"#$%&()*+,-./:;<=>?@[\\]^_`{|}~\\t\\n',\n"
"                lower=True,\n"
"                split='\\',char_level=False)\n",
"tokenize.fit_on_texts(train_sex)\n",
"x_train_sex = tokenize.texts_to_matrix(train_sex)\n",
"x_test_sex = tokenize.texts_to_matrix(test_sex)\n",
"\n",
"x_train=np.hstack((x_train,x_train_sex))\n",
"x_test=np.hstack((x_test,x_test_sex))\n",
"\n",
"scaler = StandardScaler()\n",
"age=data['age']\n",
"age=scaler.fit_transform(age.reshape(-1,1))\n",
"age_train=age[:train_size]\n",
"age_test=age[train_size:]\n",
"x_train=np.hstack((x_train,age_train))\n",
"x_test=np.hstack((x_test,age_test))\n",
"\n",
"\n",
"from sklearn import preprocessing\n",
"encoder = preprocessing.LabelBinarizer()\n",
"encoder.fit(train_label)\n",
"y_train = encoder.transform(train_label)\n",
"y_test = encoder.transform(test_label)\n",
"\n",
"from imblearn.over_sampling import SMOTE\n",
"from imblearn.combine import SMOTEENN\n",
"from imblearn.combine import SMOTETomek\n",
"from imblearn.over_sampling import RandomOverSampler\n",
"from imblearn.over_sampling import ADASYN\n",
"from sklearn import preprocessing\n",
"from imblearn.under_sampling import ClusterCentroids\n",
"from imblearn.under_sampling import RandomUnderSampler\n",
"\n",
"\n",
"print(\"Before OverSampling, counts of label '1': {}".format(sum(y_train==1)))\n",
"print(\"Before OverSampling, counts of label '0': {} \\n\".format(sum(y_train==0)))\n",
"\n",
"sm = RandomUnderSampler(random_state=42)\n",
"X_train_res, y_train_res = sm.fit_sample(x_train, y_train)\n",
"\n",
"t0 = time.time()\n",
"\n",
"\n",

```

```

"from xgboost import XGBClassifier\n",
"import time\n",
"t0 = time.time()\n",
"gbm = XGBClassifier(max_depth=4, n_estimators=20000, learning_rate=0.05,
nthread=60).fit(X_train_res, y_train_res.ravel())\n",
"y_pre = gbm.predict(x_test)\n",
"\n",
"t1 = time.time()\n",
"total = t1-t0\n",
"\n",
"cnf_matrix = confusion_matrix(y_test, y_pre)\n",
"from sklearn.metrics import f1_score\n",
"print(\f-score metric in the testing dataset: {}%\n".format(f1_score(y_test, y_pre,
average='binary') ))\n",
"from sklearn import metrics\n",
"fpr, tpr, thresholds = metrics.roc_curve(y_test, y_pre)\n",
"print(\AUC of test dataset is: {}%\n".format(metrics.auc(fpr, tpr)))\n",
"class_names = [0,1]\n",
"plt.figure()\n",
"plot_confusion_matrix(cnf_matrix, classes=class_names, title='Confusion matrix')\n",
"plt.show()\n",
"print(datetime.datetime.now())\n",
"print(\total time all features xgboost and RandomOverSampler:{}%\n".format(total))\n",
"\n",
"fpr, tpr, threshold = metrics.roc_curve(y_test, y_pre)\n",
"roc_auc = metrics.auc(fpr, tpr)\n",
"\n",
"# method I: plt\n",
"import matplotlib.pyplot as plt\n",
"plt.title('Receiver Operating Characteristic')\n",
"plt.plot(fpr, tpr, 'b', label = 'AUC = %0.2f' % roc_auc)\n",
"plt.legend(loc = 'lower right')\n",
"plt.plot([0, 1], [0, 1], 'r--')\n",
"plt.xlim([0, 1])\n",
"plt.ylim([0, 1])\n",
"plt.ylabel('True Positive Rate')\n",
"plt.xlabel('False Positive Rate')\n",
"plt.show()
]
},
{
"cell_type": "code",
"execution_count": null,
"metadata": {},

```

```

"outputs": [],
"source": []
},
{
"cell_type": "code",
"execution_count": null,
"metadata": {},
"outputs": [],
"source": []
},
{
"cell_type": "code",
"execution_count": 1,
"metadata": {},
"outputs": [
{
"name": "stdout",
"output_type": "stream",
"text": [
"Collecting xgboost\n",
" Using cached
https://files.pythonhosted.org/packages/c1/24/5fe7237b2eca13ee0cfb100bec8c23f4e69ce9df
852a64b0493d49dae4e0/xgboost-0.90-py2.py3-none-manylinux1_x86_64.whl\n",
"Requirement already satisfied, skipping upgrade: scipy in
/usr/local/envs/py3env/lib/python3.5/site-packages (from xgboost) (1.0.0)\n",
"Requirement already satisfied, skipping upgrade: numpy in
/usr/local/envs/py3env/lib/python3.5/site-packages (from xgboost) (1.14.0)\n",
"Installing collected packages: xgboost\n",
" Found existing installation: xgboost 0.6a2\n",
" Uninstalling xgboost-0.6a2:\n",
" Successfully uninstalled xgboost-0.6a2\n",
"Successfully installed xgboost-0.90\n"
]
}
],
"source": [
"!pip install xgboost -U"
]
},
{
"cell_type": "markdown",
"metadata": {},
"source": []
}

```

```
],  
"metadata": {  
  "kernel_spec": {  
    "display_name": "Python 3",  
    "language": "python",  
    "name": "python3"  
  },  
  "language_info": {  
    "codemirror_mode": {  
      "name": "ipython",  
      "version": 3  
    },  
    "file_extension": ".py",  
    "mimetype": "text/x-python",  
    "name": "python",  
    "nbconvert_exporter": "python",  
    "pygments_lexer": "ipython3",  
    "version": "3.5.6"  
  }  
},  
"nbformat": 4,  
"nbformat_minor": 2  
}
```
